# Supplementary material for: The δ subunit of F1Fo-ATP synthase is required for pathogenicity of Candida albicans
Source: PubMed Central journal article supplement (PMC8519961; doi:10.1038/s41467-021-26313-9), 2021-10-15
Supplement: 41467_2021_26313_MOESM1_ESM.pdf [file 41467_2021_26313_MOESM1_ESM.pdf]

## Supplementary Information

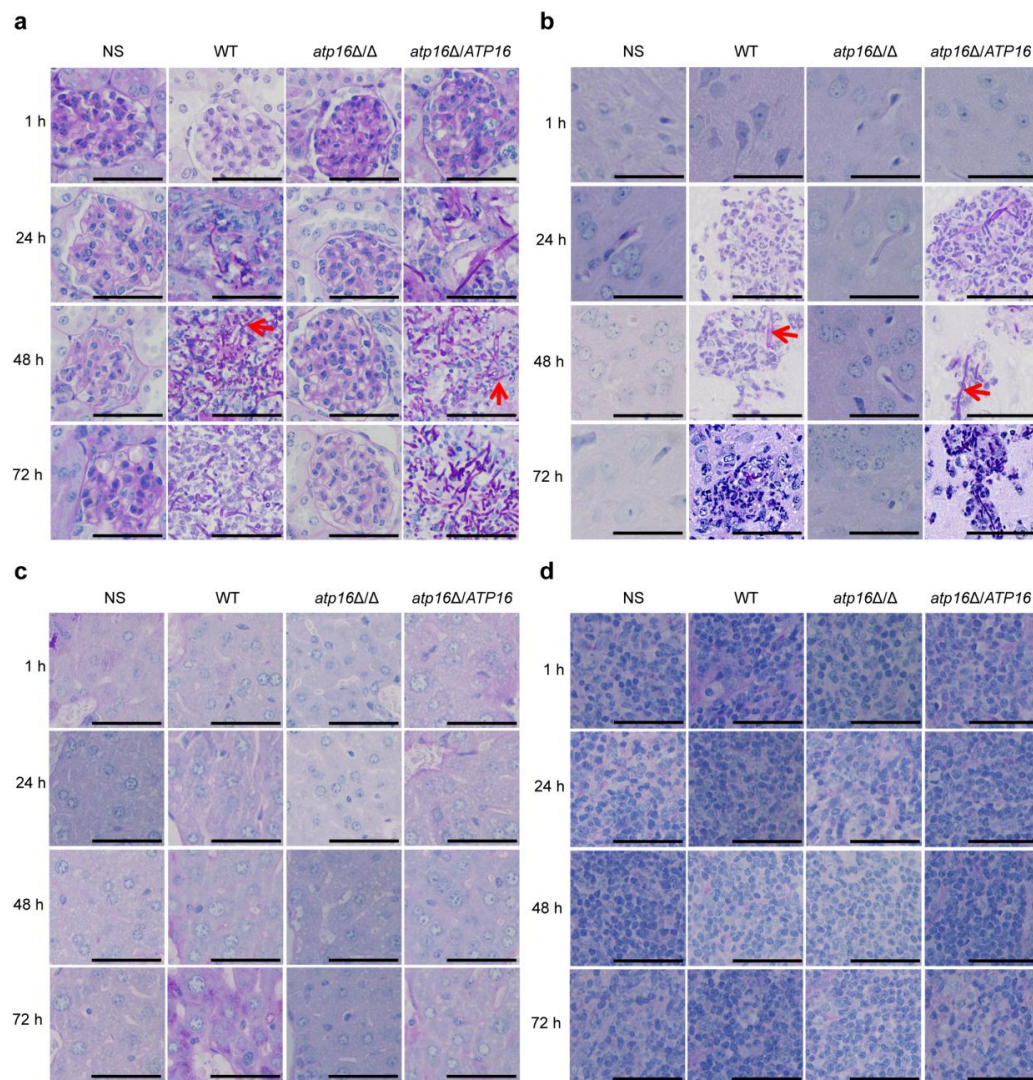

### Supplementary Fig. 1 | Representative images of PAS-stained main organs.

Kidney, brain, liver and spleen sections of mice ( $n = 3$ ) at 1, 24, 48, and 72 h after intravenous injection with NS and infection with WT, *atp16Δ/Δ*, and *atp16Δ/ATP16* ( $5 \times 10^5$  CFU per mice). **a**, Kidneys. *atp16Δ/Δ* displayed similar results to NS control. WT and *atp16Δ/ATP16* showed *C. albicans* filamentation at 1 h after infection, and the number of hyphae continued to increase throughout the entire course of the experiment. *C. albicans* colocalized with phagocytes to form abscesses at 24, 48, and 72 h after infection. **b**, Brains. *atp16Δ/Δ* displayed similar results to NS control. WT and *atp16Δ/ATP16* showed *C. albicans* filamentation at 24, 48, and 72 h after infection. *C. albicans* colocalized with phagocytes to form small scattered multifocal abscesses. **c** and **d**, Livers and spleens. *C. albicans* filamentation was not observed at any time point after infection; rather, phagocytes accumulated in large numbers but did not organize into abscesses in NS, WT, *atp16Δ/Δ* and *atp16Δ/ATP16*. In **a**, **b**, **c** and **d**, one representative experiment out of three independent experiments is shown. Arrowheads indicate fungal hyphae. Magnification  $\times 400$ . Scale bar is 50  $\mu$ M.

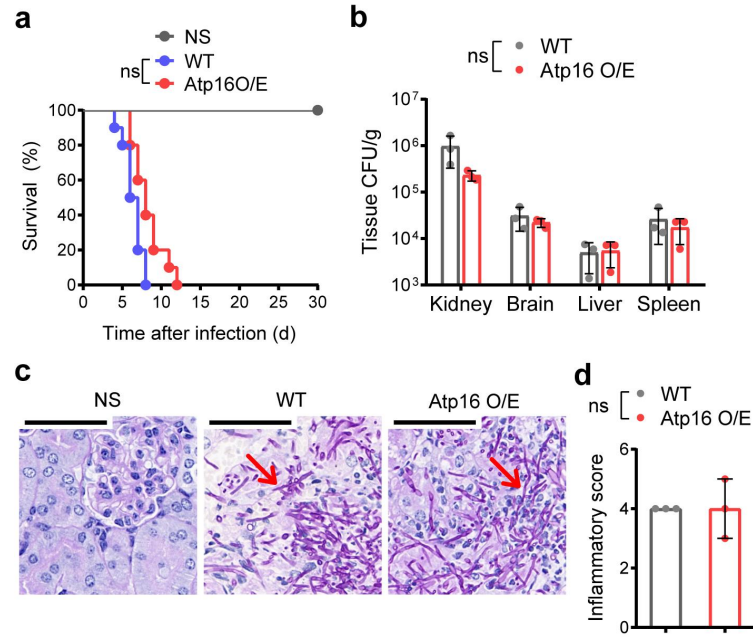

**Supplementary Fig. 2 | Overexpression of the  $\delta$  subunit does not enhance lethal *C. albicans* infection.**

**a**, Survival curves of mice ( $n = 10$ ) after intravenous infection with *C. albicans* Atp16 O/E ( $5 \times 10^5$  CFU per mice). **b**, *C. albicans* fungal burdens (CFU per g tissue) in organs ( $n = 3$ ) 48 h after systemic infection with Atp16 O/E ( $5 \times 10^5$  CFU per mice). **c** and **d**, Representative images of PAS-stained kidney sections of mice ( $n = 3$ ) (**c**) and combined inflammatory score based on renal immune cell infiltration (inflammation) and tissue destruction ( $n = 3$ ) (**d**) 48 h after intravenous infection with Atp16 O/E ( $5 \times 10^5$  CFU per mice). Magnification  $\times 400$ . Scale bar is 50  $\mu$ m. In **a**, **b**, **c** and **d**, there were no significant differences in the phenotypes of Atp16 O/E compared with that of WT. In **c**, one representative experiment out of three independent experiments is shown. In **a**, **b** and **d**, data are expressed as the mean  $\pm$  SD. ns, not significant; by log-rank test (**a**), or two-tailed unpaired Student's *t*-test (**b**, **d**).

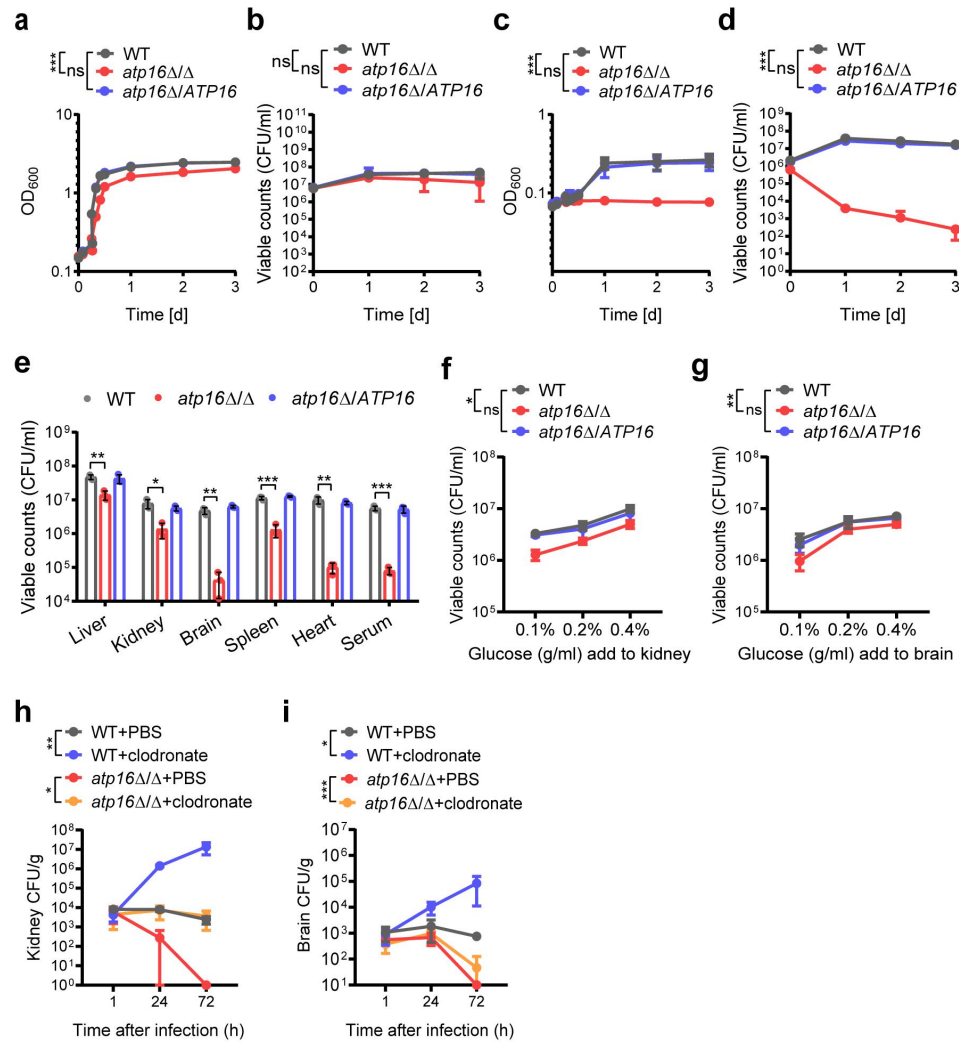

**Supplementary Fig. 3 | Deletion of the  $\delta$  subunit does not lead to remarkable *C. albicans* growth defects.**

**a-d**, The growth of WT, *atp16Δ/Δ* and *atp16Δ/ATP16* in YPD (**a**, **b**) and YPS (**c**, **d**) media over time determined by cell density (OD<sub>600</sub>) (**a**, **c**) and viable cell counts (CFU/ml) (**b**, **d**). **e-g**, The growth of WT, *atp16Δ/Δ* and *atp16Δ/ATP16* in liver, kidney, brain, spleen, and heart fresh tissue homogenates (500 mg/ml, without inactivation) and serum (100%, without inactivation) (**e**) and in kidney (**f**) and brain (**g**) homogenates (500 mg/ml, without inactivation) supplemented with 0.1%, 0.2%, and 0.4% glucose for 24 h determined by viable cell counts (CFU/ml). The initial density of *C. albicans* was  $5 \times 10^3$  CFU/ml. **h** and **i**, *C. albicans* fungal burdens (CFU per g tissue) in kidneys (**h**) and brains (**i**) of BALB/c mice that were injected with PBS liposomes ( $n = 3$ ) or clodronate liposomes ( $n = 3$ ) 24 h before and 24 h after intravenous infection with WT and *atp16Δ/Δ* ( $2 \times 10^5$  CFU per mice). In **a**, **b**, **c**, **d**, **e**, **f**, **g**, **h** and **i**, data are expressed as the mean  $\pm$  SD of three independent experiments. \* $P < 0.05$ , \*\* $P < 0.01$ , \*\*\* $P < 0.001$ ; ns, not significant; by two-way ANOVA (**a**, **b**, **c**, **d**, **f**, **g**, **h** and **i**), or two-tailed unpaired Student's *t*-test (**e**).

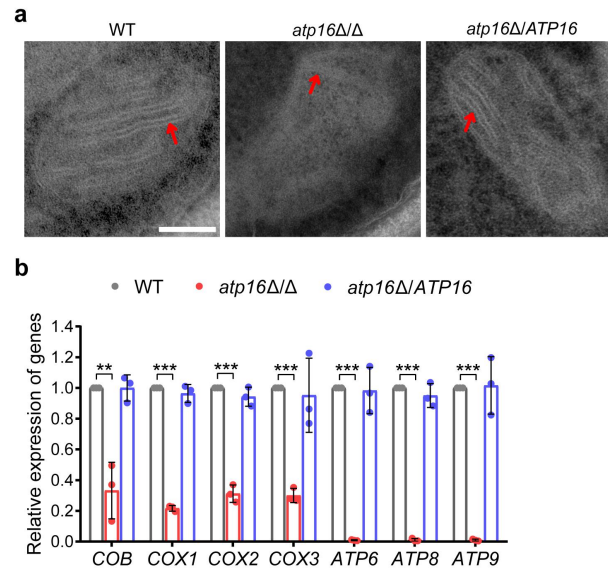

**Supplementary Fig. 4 | The role of the  $\delta$  subunit in the mitochondrial morphology and mRNA expression levels of mitochondrial genes.**

**a**, The mitochondrial morphology of WT, *atp16Δ/Δ* and *atp16Δ/ATP16* cultured in YNB + 2% glucose medium for 12 h were observed by TEM. Arrowheads indicate the mitochondrial cristae. Magnification  $\times 23000$ . Scale bar is 0.2  $\mu\text{M}$ . **b**, The mRNA expression levels of the mitochondrial genes *COB* (encoded complex IV subunit 3), *COX1*, *COX2*, *COX3* (encoded complex IV subunits 1, 2, 3), *ATP6*, *ATP8*, and *ATP9* (encoded  $F_1F_0$ -ATP synthase subunits a, 8, c) in WT, *atp16Δ/Δ* and *atp16Δ/ATP16* were assessed by RT-qPCR. In **b**, Data are expressed as the mean  $\pm$  SD of three independent experiments. \*\* $P < 0.01$ , \*\*\* $P < 0.001$ ; by two-tailed unpaired Student's *t*-test.

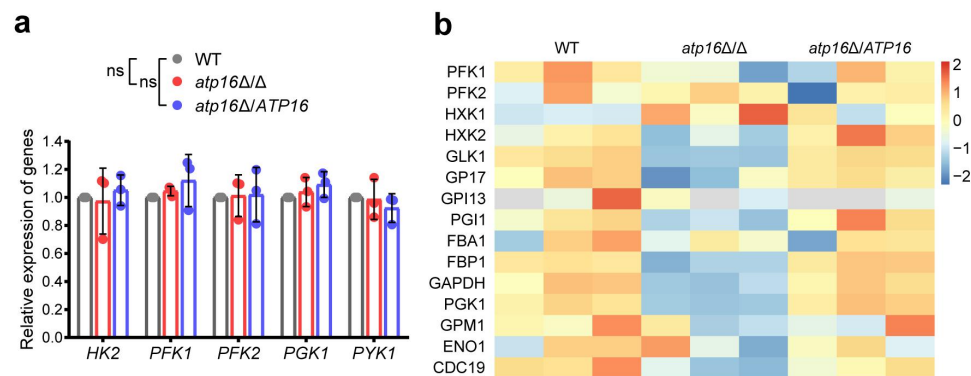

**Supplementary Fig. 5 | The role of the  $\delta$  subunit in the mRNA and protein expression levels of key enzymes in glycolysis.**

**a**, Relative mRNA expression levels of glycolytic enzymes in WT, *atp16Δ/Δ* and *atp16Δ/ATP16* were assessed by RT-qPCR. **b**, The expression levels of proteins involved in glycolysis were assessed by proteomics analysis. The three columns for each strain represent three experiments performed with 3 biological replicates. In **a**, data are expressed as the mean  $\pm$  SD of three independent experiments. ns, not significant; two-tailed unpaired Student's *t*-test.



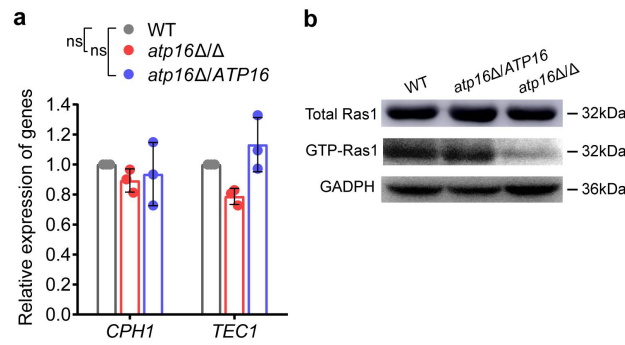

**Supplementary Fig. 6 | The role of the  $\delta$  subunit in the mRNA expression levels of the MAPK pathway transcription factors and activation of Ras1.**

**a**, Relative mRNA expression levels of the MAPK pathway transcription factors Cph1 and Tec1 in WT, *atp16Δ/Δ* and *atp16Δ/ATP16* were assessed by RT-qPCR. **b**, Total Ras1 protein and GTP-Ras1 fraction in WT, *atp16Δ/Δ* and *atp16Δ/ATP16* were assessed by immunoprecipitation. GAPDH blots were shown as loading control. In **a**, data are expressed as the mean  $\pm$  SD of three independent experiments. ns, not significant; by two-tailed unpaired Student's *t*-test. In **b**, one representative experiment out of three independent experiments is shown.

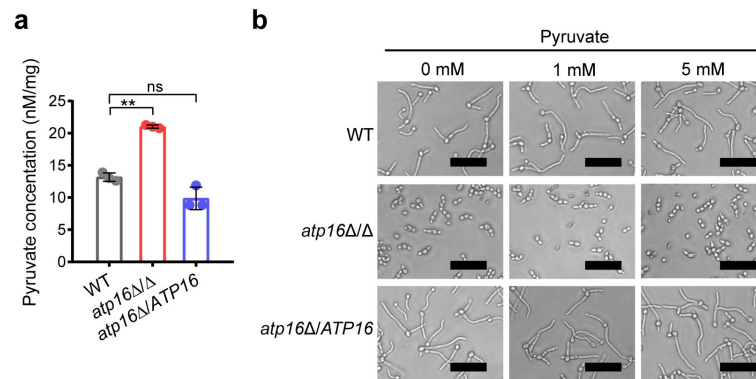

**Supplementary Fig. 7 | The effects of pyruvate on *C. albicans* hyphal formation.**

**a**, Intracellular pyruvate concentration per mg protein in WT, *atp16Δ/Δ* and *atp16Δ/ATP16*. **b**, Hyphae formation of WT, *atp16Δ/Δ* and *atp16Δ/ATP16* in the presence of exogenous pyruvate (0, 1, 5 mM) in Spider medium after incubation at 37 °C for 3.5 h. Magnification  $\times$  400. Scale bar is 50  $\mu$ m. In **a**, data are expressed as the mean  $\pm$  SD of three independent experiments.  $**P = 0.0037$ ; ns, not significant; by two-tailed unpaired Student's *t*-test. In **b**, one representative experiment out of three independent experiments is shown.

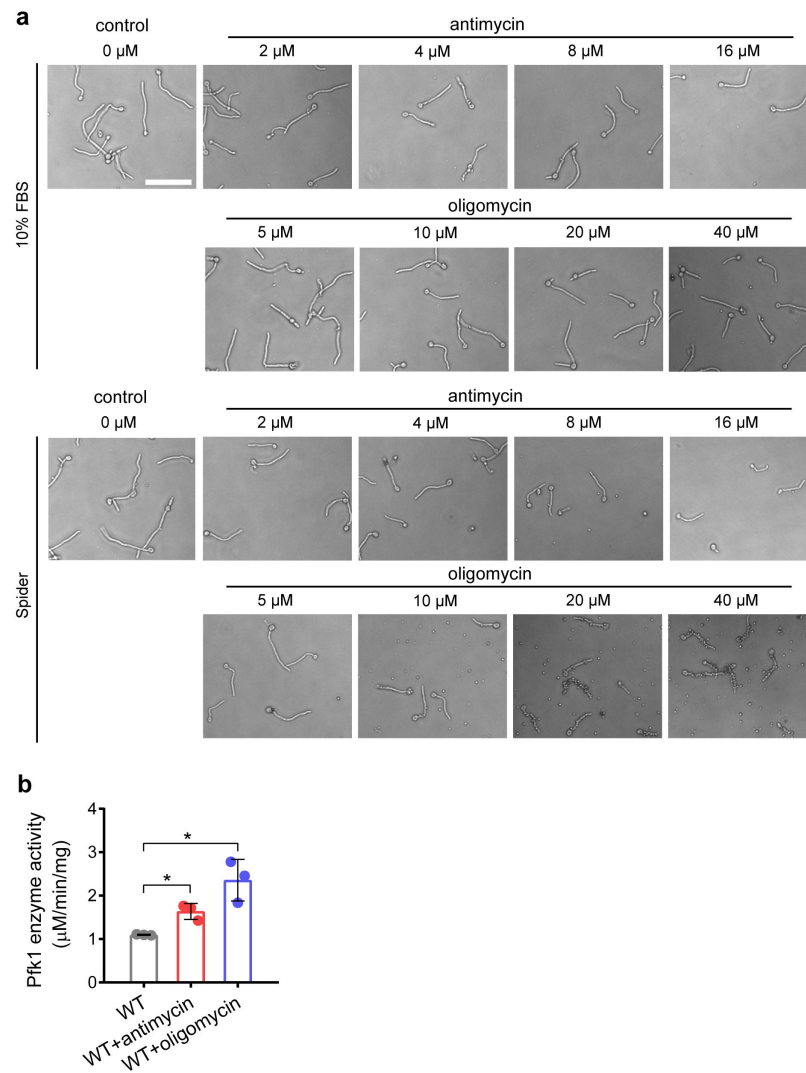

**Supplementary Fig. 8 | The effects of antimycin/oligomycin on *C. albicans* hyphal formation and Pfk1 activity.**

**a**, Hyphae formation of WT in the presence of the oxidation respiratory chain inhibitor antimycin (0, 2, 4, 8, 16  $\mu\text{M}$ ) and  $\text{F}_1\text{F}_0$ -ATP synthase inhibitor oligomycin (0, 5, 10, 20, 40  $\mu\text{M}$ ) after cultured in 10% FBS and Spider media at 37 °C for 3.5 h. Magnification  $\times$  400. Scale bar is 50  $\mu\text{M}$ . **b**, The activity of Pfk1 in WT in the presence of the oxidation respiratory chain inhibitor antimycin (8  $\mu\text{M}$ ) and  $\text{F}_1\text{F}_0$ -ATP synthase inhibitor oligomycin (20  $\mu\text{M}$ ) after cultured in YPD medium at 30 °C for 12 h. In **b**, Data are expressed as the mean  $\pm$  SD of three independent experiments. \* $P < 0.05$ ; by two-tailed unpaired Student's  $t$ -test.

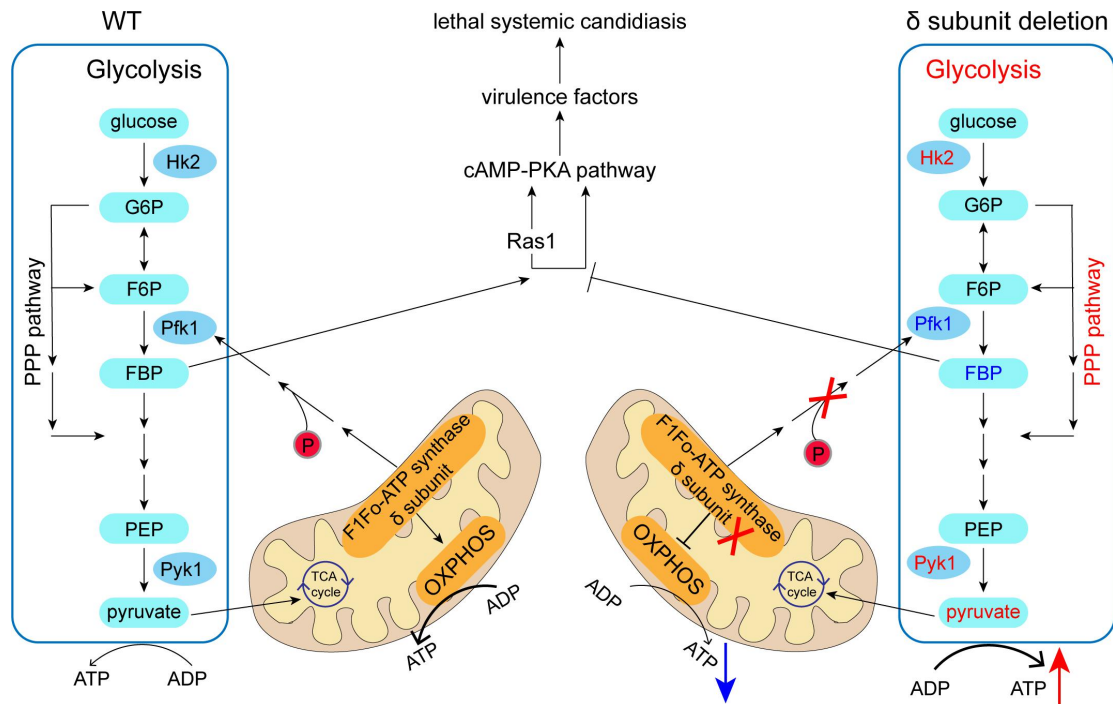

**Supplementary Fig. 9 | Diagram illustrating that  $\delta$  subunit deletion failed to cause lethal systemic candidiasis by regulating FBP-mediated cAMP-PKA signalling dependent virulence traits.**

Compared with WT (**left**),  $\delta$  subunit deletion interrupted Pfk1 phosphorylation, reduced enzymatic activity, decreased the downstream FBP level, blocked Ras1-dependent and -independent cAMP-PKA pathways, curtailed virulence factors, and finally protected mice from fatal infection (**right**). Red font and arrowhead represent increases, and blue font and arrowhead represent decreases.

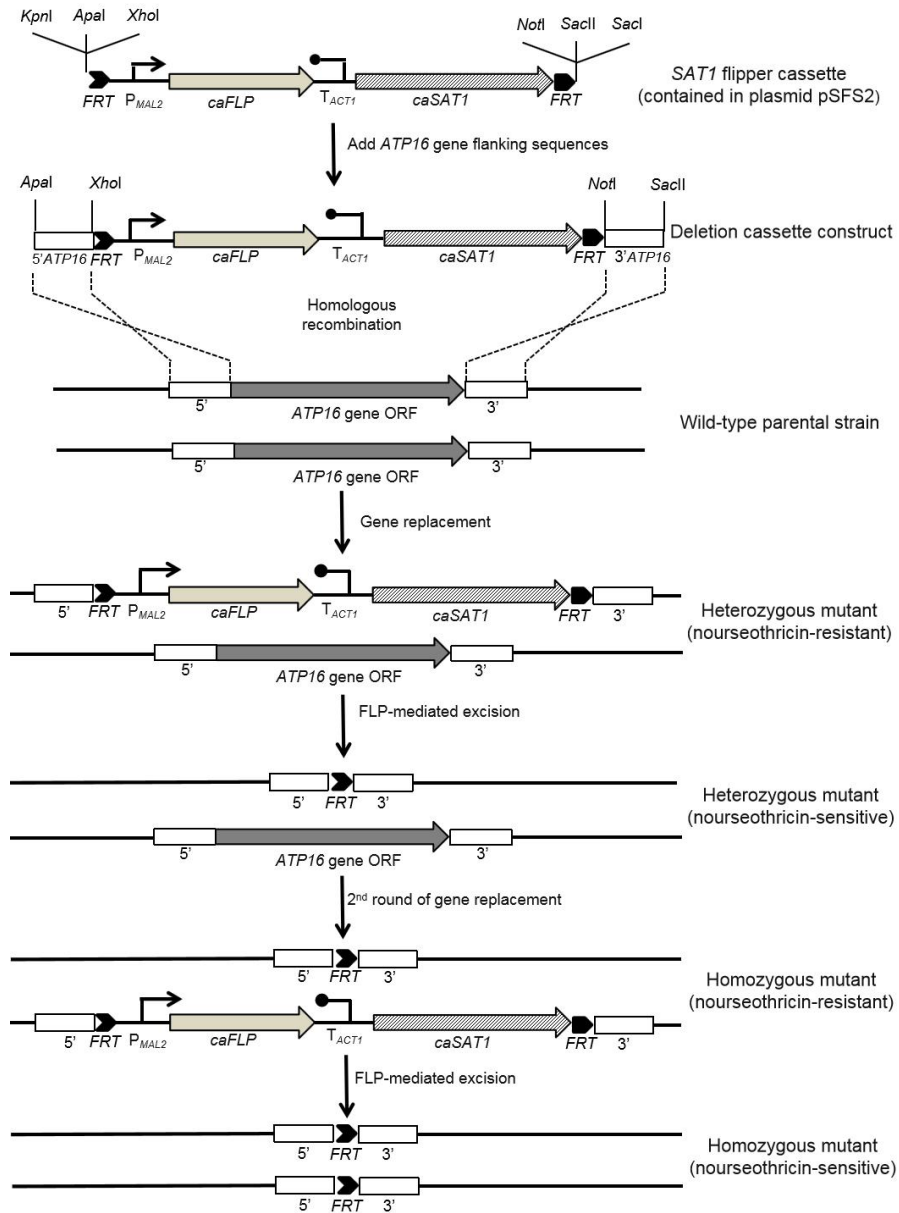

Supplementary Fig. 10 | Schematic diagram of the *ATP16* gene disruption by the *SAT1*-Flipper method.



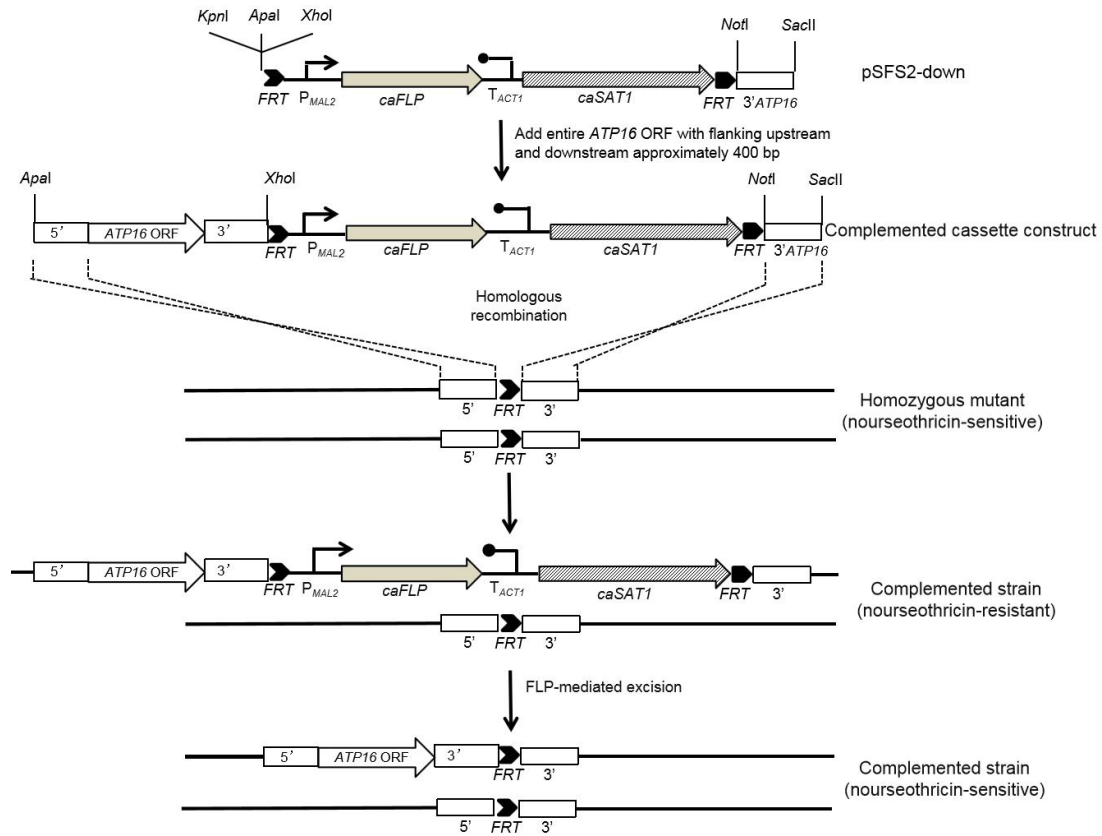

Supplementary Fig. 11 | Schematic diagram of the intact *ATP16* allele complemented into the *ATP16* homozygous mutant.

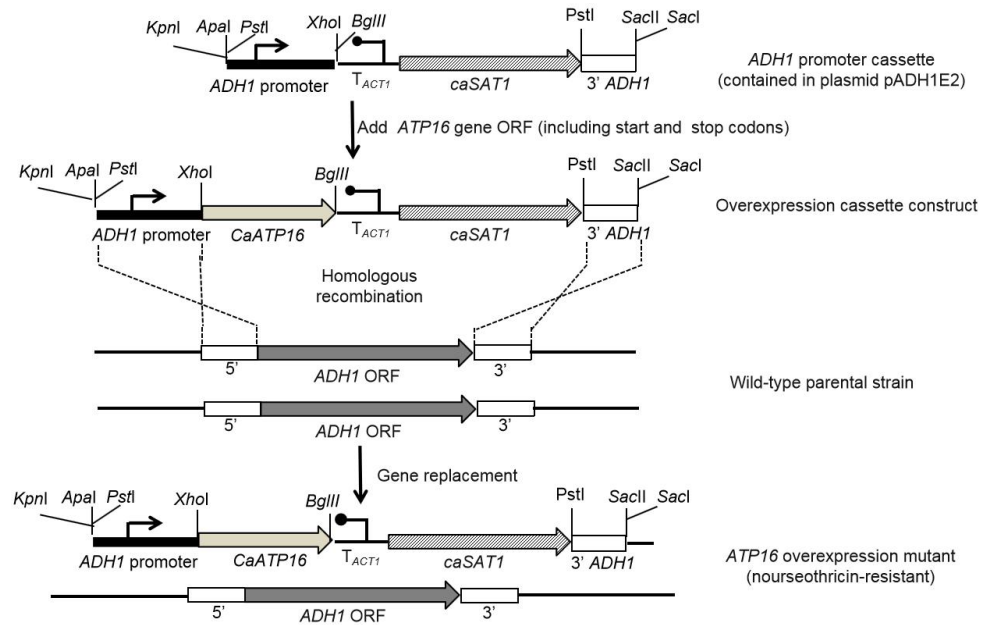

Supplementary Fig. 12 | Schematic diagram of the *ATP16* overexpression strain obtained by introducing an *ATP16* gene ORF to SC5314.

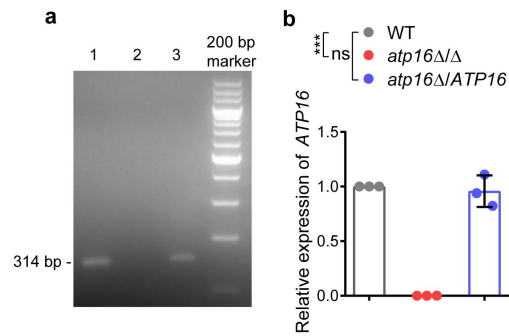

**Supplementary Fig. 13 | Confirmation of *ATP16* gene deletion and complementation by PCR and RT–qPCR analysis.**

a, The *ATP16* gene was PCR-amplified from the genomic DNA of the WT, *atp16Δ/Δ* and *atp16Δ/ATP16* with primers ATP16-F+ATP16-R. 1, WT was amplified stripe at 314 bp; 2, *atp16Δ/Δ* was without an amplified stripe; 3, *atp16Δ/ATP16* amplified stripe at 314 bp. b, RT–qPCR analysis of the mRNA level in *ATP16* from the three strains was performed. The relative mRNA level of *ATP16* in *atp16Δ/Δ* showed a 0.00015-fold change compared with WT; the relative mRNA level of *ATP16* in *atp16Δ/ATP16* showed a 0.47-fold change compared with WT. In b, data are expressed as the mean ± SD of three independent experiments. \*\*\* $P < 0.001$ ; ns, not significant; by two-tailed unpaired Student's *t*-test.

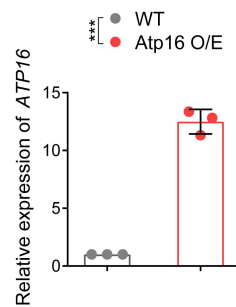

**Supplementary Fig. 14 | Confirmation of *ATP16* gene overexpression by RT–qPCR analysis.**

The relative mRNA level of *ATP16* in Atp16 O/E was approximately 12-fold different from that in WT. Data are expressed as the mean ± SD of three independent experiments. \*\*\* $P < 0.001$ ; by two-tailed unpaired Student's *t*-test.

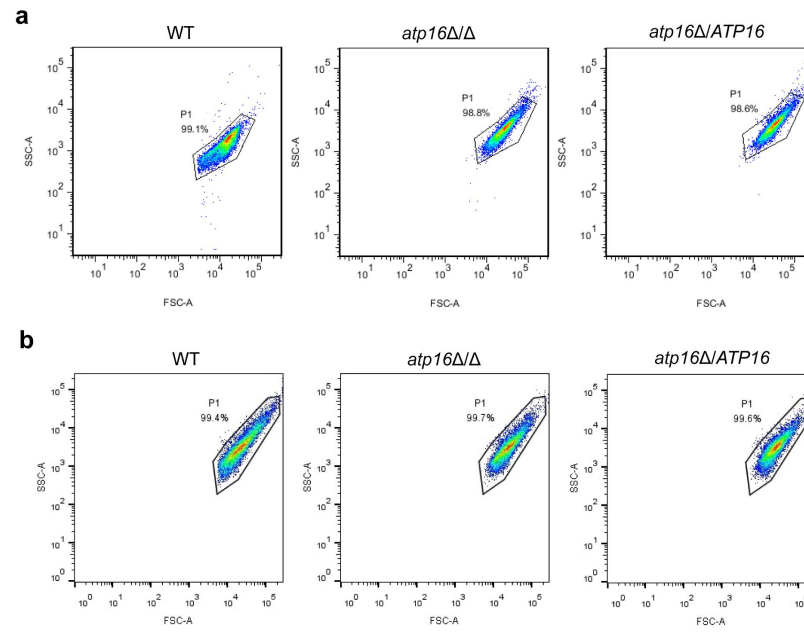

**Supplementary Fig. 15 | Summary of the gating strategy from the ROS assay and  $\Delta\Psi_m$  assay.**

Pseudocoloured density plots displaying the side-scatter and forward-scatter data for WT, *atp16* $\Delta/\Delta$  and *atp16* $\Delta/ATP16$  cells when run on the FACScan flow cytometer and analysed with the FACSDiva Software. Gates displayed in black are the gates that were applied to all samples for data shown in Fig. 3e (a) and Fig. 3f (b).

Supplementary Table 1. Summary of pathogenicity-related proteins of *C. albicans* as determined in a murine model of candidiasis.

| Homology with common pathogenic fungi | Non-homology with <i>Homo sapiens</i> and gut flora | Essentiality in lethal infection | Gene name   | Protein accession | Protein name                                    | Function                                                     | Biological process                                          | Virulence in a disseminated candidiasis model | Reference                                                |
|---------------------------------------|-----------------------------------------------------|----------------------------------|-------------|-------------------|-------------------------------------------------|--------------------------------------------------------------|-------------------------------------------------------------|-----------------------------------------------|----------------------------------------------------------|
| Yes                                   | Yes                                                 | Yes                              | ATP16       | A0A1D8PUD2        | F1Fo-ATP synthase subunit delta                 | produces ATP from ADP                                        | ATP synthesis coupled proton transport                      | avirulent                                     | this study                                               |
| Yes                                   | Yes                                                 | Yes                              | FAS2        | A0A1D8PK65        | Fatty acid synthase subunit alpha               | fatty-acid synthesis                                         | Alpha subunit of fatty-acid synthase                        | avirulent                                     | Zhao XJ, et al., Infect Immun, 1997; 65:829.             |
| Yes                                   | Yes                                                 | Yes                              | RFG1        | Q5A220            | Repressor of filamentous growth 1               | filamentous, hyphal growth                                   | transcriptional regulator                                   | avirulent                                     | Kadosh D, Johnson AD. Mol Cell Biol, 2001; 21: 2496.     |
| Yes                                   | Yes                                                 | Yes                              | VMA6        | A0A1D8PKX3        | V-type proton ATPase subunit                    | acidifying a variety of intracellular compartments           | vacuolar proton-transporting V-type ATPase complex assembly | avirulent                                     | Jia C, et al., Fungal Genet Biol, 2018; 114:1.           |
| Yes                                   | Yes                                                 | Yes                              | VMA7        | A0A1D8PH17        | V-type proton ATPase subunit F                  | vacuole acidification                                        | putative vacuolar H <sup>+</sup> -ATPase (V-ATPase) subunit | avirulent                                     | Poltermann S, et al., Microbiology, 2005; 151: 1645.     |
| Yes                                   | Yes                                                 | Yes                              | TPS1        | Q92410            | Alpha, alpha-trehalose-phosphate synthase       | stress response, hyphal growth                               | trehalose-6-phosphate synthase                              | avirulent                                     | Zaragoza O, et al., J Bacteriol, 1998; 180: 3809.        |
| No                                    | Yes                                                 | Yes                              | ACE2        | Q59RR0            | Cell wall transcription factor ACE2             | morphogenesis                                                | transcription activator                                     | avirulent                                     | Kelly MT, et al., Mol Microbiol, 2004; 53: 969.          |
| No                                    | Yes                                                 | Yes                              | ARG2        | Q59MB6            | Amino-acid acetyltransferase, mitochondrial, EC | N-acetylglutamate synthase involved in arginine biosynthesis | arginine biosynthetic process                               | avirulent                                     | Epp E, et al., Mol Microbiol, 2010; 75: 1182.            |
| No                                    | Yes                                                 | Yes                              | ARV1        | Q5ANH2            | Protein ARV1                                    | Mediator of sterol homeostasis                               | intracellular sterol transport                              | avirulent                                     | Gallo-Ebert C, et al., Fungal Genet Biol, 2012; 49: 101. |
| No                                    | Yes                                                 | Yes                              | CAP1 (SRV2) | Q5AJU7            | AP-1-like transcription factor CAP1             | cAMP-mediated signaling                                      | Adenylate cyclase-associated protein                        | avirulent                                     | Bahn YS, Sundstrom P. J Bacteriol, 2001; 183: 3211.      |
| No                                    | Yes                                                 | Yes                              | CDC35       | A0A1D8PR83        | Adenylate cyclase                               | cAMP-mediated signaling                                      | adenylyl cyclase                                            | avirulent                                     | Rocha CR, et al., Mol Biol Cell, 2001; 12: 3631.         |

|    |     |     |        |            |                                                      |                                       |                                           |           |                                                                   |
|----|-----|-----|--------|------------|------------------------------------------------------|---------------------------------------|-------------------------------------------|-----------|-------------------------------------------------------------------|
| No | Yes | Yes | CRK1   | Q9Y7W4     | Serine/threonine-protein kinase BUR1                 | hyphal growth, pathogenesis           | Protein kinase of the Cdc2 subfamily      | avirulent | Chen J, et al., Mol Cell Biol, 2000; 20: 8696.                    |
| No | Yes | Yes | ECM33  | Q5AGC4     | Cell surface GPI-anchored protein ECM33              | cell wall                             | cell surface GPI protein                  | avirulent | Martinez-Lopez R, et al., Microbiology, 2004; 150: 3341.          |
| No | Yes | Yes | EDC3   | A0A1D8PM93 | Enhancer of mRNA-decapping protein 3                 | filamentous growth                    | cytoplasmic mRNA processing body assembly | avirulent | Jeong J, et al., Fungal Genet Biol, 2016; 97: 18.                 |
| No | Yes | Yes | FLO8   | Q59QW5     | Transcriptional regulator of filamentous growth FLO8 | hyphal formation                      | transcription factor                      | avirulent | Cao F, et al., Mol Biol Cell, 2006; 17: 295.                      |
| No | Yes | Yes | FTR1   | A0A1D8PFV0 | High-affinity iron permease                          | iron transport                        | High-affinity iron permease               | avirulent | Ramanan N, Wang Y. Science, 2000; 288: 1062.                      |
| No | Yes | Yes | GCN5   | Q59PZ5     | Histone acetyltransferase                            | Catalytic activity                    | pathogenesis                              | avirulent | Chang P, et al., Fungal Genet Biol, 2015; 81:132.                 |
| No | Yes | Yes | GOA1   | Q5A672     | GOA1 orf19.3818, CAALFM_C404640 CA                   | oxidative stress                      | Protein required for respiratory growth   | avirulent | Bambach A, et al., Eukaryot Cell, 2009; 8: 1706.                  |
| No | Yes | Yes | LIP8   | Q9P8V9     | Lipase 8                                             | Catalytic activity                    | pathogenesis                              | avirulent | Gácsér A, Stehr F. Infect Immun, 2007; 75: 4710.                  |
| No | Yes | Yes | MCU1   | Q5AKZ4     | Mcu1p                                                | carbon utilization                    | pathogenesis                              | avirulent | Guan G, et al., Fungal Genet Biol, 2015; 81: 150.                 |
| No | Yes | Yes | MGM1   | Q5AFB7     | Dynamamin-related GTPase                             | GTPase activity                       | membrane fusion                           | avirulent | Liang C, et al., Fungal Genet Biol, 2018; 120: 42.                |
| No | Yes | Yes | NAG5   | Q59RW5     | N-acetylglucosamine kinase 1, GlcNAc kinase 1        | N-acetylglucosamine catabolic process | N-acetylglucosamine (GlcNAc) kinase       | avirulent | Yamada-Okabe T, et al., Eur J Biochem, 2001; 268: 2498.           |
| No | Yes | Yes | NDT80  | Q5ACU9     | Transcription factor                                 | filamentous, hyphal growth            | transcription factor                      | avirulent | Sellam A, et al., Eukaryot Cell, 2010; 9: 634.                    |
| No | Yes | Yes | NGG1   | Q5AI28     | Histone acetyltransferase                            | histone acetyltransferase activity    | histone H3 acetylation                    | avirulent | Li D, et al., Future Microbiol, 2017; 12: 1497.                   |
| No | Yes | Yes | NOT4   | A0A1D8PSH4 | CCR4-NOT core ubiquitin-protein ligase subunit       | filamentous growth, pathogenesis      | Putative E3 ubiquitin-protein ligase      | avirulent | Krueger KE, et al., Microbiology, 2004; 150: 229.                 |
| No | Yes | Yes | RTT109 | Q5AAJ8     | Histone acetyltransferase RTT109                     | histone acetylation, pathogenesis     | histone acetyltransferase                 | avirulent | Lopes da Rosa J, et al., Proc Natl Acad Sci USA, 2010; 107: 1594. |
| No | Yes | Yes | SIT1   | A0A1D8PEJ7 | Basic amino acid transporter                         | ferrichrome transport                 | Transporter of ferrichrome siderophores   | avirulent | Heymann P, et al., Infect Immun, 2002; 70: 5246.                  |



|    |     |     |        |            |                                                                             |                                                             |                                                                                                |                    |                                                       |
|----|-----|-----|--------|------------|-----------------------------------------------------------------------------|-------------------------------------------------------------|------------------------------------------------------------------------------------------------|--------------------|-------------------------------------------------------|
| No | Yes | Yes | SSK1   | Q5AKU6     | Oxidative stress response two-component system protein SSK1                 | cell wall organization, filamentous growth                  | Response regulator of two-component system                                                     | avirulent          | Calera JA, et al., Infect Immun, 2000; 68: 518.       |
| No | Yes | Yes | SWI1   | Q59UR3     | Swi1p                                                                       | adhesion,hyphal growth                                      | Protein involved in transcription regulation                                                   | avirulent          | Mao X, et al., FEBS Letts, 2006; 580: 2615.           |
| No | Yes | Yes | TUP1   | P0CY34     | Transcriptional repressor TUP1                                              | Represses transcription                                     | pathogenesis                                                                                   | avirulent          | Murad AM, et al., EMBO J, 2001; 20: 4742.             |
| No | Yes | Yes | VMA5   | Q5A2U9     | V-type proton ATPase subunit C                                              | catalytic activity                                          | Hydrogen ion transport                                                                         | avirulent          | Zhang K, et al., Future Microbiol, 2017; 12: 1147.    |
| No | Yes | Yes | VPH1   | Q59R99     | V-type proton ATPase subunit a                                              | catalyzes the translocation of protons across the membranes | vacuolar acidification                                                                         | avirulent          | Patenaude C, et al., J Biol Chem, 2013; 288: 26256.   |
| No | Yes | Yes | VPS34  | A0A1D8PDV7 | Phosphatidylinositol 3-kinase VPS34                                         | autophagy, endocytosis                                      | phosphatidylinositol 3-kinase                                                                  | avirulent          | Bruckmann A, et al., Microbiology, 2000; 146: 2755.   |
| No | Yes | Yes | PHR1   | P43076     | pH-responsive protein 1                                                     | fungal type cell wall organization, hyphal growth           | Glycosidase of cell surface;high pH or filamentation induced                                   | avirulent          | De Bernardis F, et al., Infect Immun, 1998; 66: 3317. |
| No | Yes | Yes | SSN6   | Q5ADP3     | Transcription regulator                                                     | hyphal, filamentous growth                                  | putative global transcriptional co-repressor                                                   | avirulent          | Hwang C, et al., Mol Microbiol, 2003; 47: 1029.       |
| No | Yes | Yes | SUN41  | Q59NP5     | Secreted beta-glucosidase SUN41                                             | adhesion, biofilm formation                                 | Putative cell wall glycosidase                                                                 | avirulent          | Norice CT, et al., Eukaryot Cell, 2007; 6: 2046.      |
| No | Yes | Yes | CHS1   | Q5A594     | Chitin synthase                                                             | cell wall biosynthetic process                              | chitin sythase                                                                                 | avirulent          | Munro CA, et al., Mol Microbiol, 2001; 39: 1414.      |
| No | Yes | Yes | CHK1   | Q5AHA0     | Histidine protein kinase 1                                                  | hyphal growth defect                                        | cell wall synthesis                                                                            | avirulent in mouse | Calera JA, et al., Infect Immun, 1999; 67: 4280.      |
| No | No  | Yes | CHO1   | A0A1D8PF32 | CDP-diacylglycerol--serine O-phosphatidyltransferase                        | Catalytic activity                                          | phosphatidylethanolamine biosynthesis                                                          | avirulent in mouse | Chen YL, et al., Mol Microbiol, 2010; 75:1112.        |
| No | No  | Yes | ATP1   | A0A1D8PDC4 | F1F0 ATP synthase subunit alpha                                             | Produces ATP from ADP                                       | ATP synthesis coupled proton transport                                                         | avirulent          | Li S, et al., Front Microbiol, 2017; 8: 285.          |
| No | No  | Yes | ATP2   | A0A1D8PKZ9 | F1F0 ATP synthase subunit beta                                              | Produces ATP from ADP                                       | ATP synthesis coupled proton transport                                                         | avirulent          | Li S, et al., Front Microbiol, 2018; 9: 1025.         |
| No | No  | Yes | ADE5,7 | A0A1D8PE67 | Bifunctional aminoimidazole ribotide synthase/glycinamide ribotide synthase | de novo purine nucleotide biosynthetic pathway              | putative aminoimidazole ribotide synthetase (AIRS) and glycineamide ribotide synthetase (GARS) | avirulent          | Jezewski S, et al., Microbiology, 2007; 153: 2351.    |

|    |    |     |             |            |                                                           |                                                             |                                                           |           |                                                        |
|----|----|-----|-------------|------------|-----------------------------------------------------------|-------------------------------------------------------------|-----------------------------------------------------------|-----------|--------------------------------------------------------|
| No | No | Yes | ARP2        | AOW31565   | Putative component of the Arp2/3 complex                  | fungal type cell wall organization                          | Putative component of the Arp2/3 complex                  | avirulent | Epp E, et al., Mol Microbiol, 2010; 75: 1182.          |
| No | No | Yes | CLA4        | Q5APR8     | Serine/threonine-protein kinase CLA4                      | filamentous growth, chlamydosporium formation and virulence | activation of protein kinase activity                     | avirulent | Leberer E, et al., Curr Biol, 1997; 7: 539.            |
| No | No | Yes | GAT1        | Q5A432     | Transcriptional regulatory protein GAT1                   | Transcriptional regulator of nitrogen utilization           | negative regulation of transcription by RNA polymerase II | avirulent | Limjindaporn T, et al., Mol Microbiol, 2003; 50: 993.  |
| No | No | Yes | HOG1        | Q92207     | Mitogen-activated protein kinase HOG1                     | filamentous growth, fungal cell wall organization           | mitogen-activated protein (MAP) kinase                    | avirulent | Cheetham J, et al., J Biol Chem, 2011; 286: 42002.     |
| No | No | Yes | KRE5        | A0A1D8PJN6 | Kre5p                                                     | 1,6 beta-glucan biosynthetic process                        | UDP-glucose:glycoprotein glucosyltransferase (UGGT)       | avirulent | Herrero AB, et al., Eukaryot Cell, 2004; 3: 1423.      |
| No | No | Yes | PMR1        | A0A1D8PQK6 | Calcium-transporting ATPase                               | cell wall maintenance, protein glycosylation                | P-type Ca <sup>2+</sup> /Mn <sup>2+</sup> -ATPase         | avirulent | Jiang L, et al., Fungal Genet Biol, 2018; 115: 1.      |
| No | No | Yes | SAC1        | A0A1D8PEV5 | Phosphatidylinositol-3-phosphatase                        | phosphatidylinositol-4-phosphate phosphatase activity       | pathogenesis                                              | avirulent | Zhang B, et al., Fungal Genet Biol, 2015; 81: 261.     |
| No | No | Yes | SSQ1        | A0A1D8PRH1 | Hsp70 family ATPase                                       | ATPase activity                                             | cellular response to unfolded protein                     | avirulent | Dong Y, et al., Int J Biochem Cell Biol, 2017; 85: 44. |
| No | No | Yes | TFP1        | Q5AJB1     | V-type proton ATPase catalytic subunit A                  | Catalytic activity                                          | pathogenesis                                              | avirulent | Jia C, et al., Fungal Genet Biol, 2014; 71: 58.        |
| No | No | Yes | VAC1 (PEP7) | Q59UQ8     | Pep7p                                                     | adhesion, filamentous growth                                | vesicle transport pt                                      | avirulent | Franke K, et al., Microbiology, 2006; 152: 3111.       |
| No | No | Yes | YPT72       | A0A1D8PHR9 | Rab family GTPase                                         | GTPase activity                                             | pathogenesis                                              | avirulent | Johnston DA, et al., Infect Immun, 2009; 77: 2343.     |
| No | No | Yes | CMP1        | A0A1D8PCA8 | Serine/threonine-protein phosphatase                      | hyphal growth, pH stress                                    | Catalytic subunit of calcineurin                          | avirulent | Bader T, et al., Infect Immun, 2003; 71: 5344.         |
| No | No | Yes | NAG1        | Q04802     | Glucosamine-6-phosphate isomerase                         | N-acetylglucosamine catabolic process                       | Glucosamine-6-phosphate deaminase                         | avirulent | Singh P, et al., Infect Immun, 2001; 69: 7898.         |
| No | No | Yes | PMT1        | O74189     | Dolichyl-phosphate-mannose--protein mannosyltransferase 1 | cell wall organization, hyphal growth                       | isoforms of protein mannosyltransferases                  | avirulent | Timpel C, et al., J Biol Chem, 1998 ; 273: 20837.      |

|    |    |     |                  |            |                                               |                                          |                                                                             |                        |                                                      |
|----|----|-----|------------------|------------|-----------------------------------------------|------------------------------------------|-----------------------------------------------------------------------------|------------------------|------------------------------------------------------|
| No | No | Yes | VPS4             | Q5AG40     | Vacuolar protein sorting-associated protein 4 | vacuole organization, filamentous growth | Protein involved in transport from multivesicular body (MVB) to the vacuole | avirulent              | Lee SA, et al., Mycopathologia, 2009 ; 167: 55.      |
| No | No | Yes | RAD52            | Q59NG2     | Recombinase                                   | DNA double strand break repair           | required for DNA homologous recombination                                   | avirulent              | Chauhan N, et al., Infect Immun, 2005 ; 73: 8069.    |
| No | No | Yes | CDC24            | AAO25556   | GDP-GTP exchange factor for Cdc42p            | hyphal growth, pathogenesis              | GDP-GTP exchange factor for Cdc42p                                          | avirulent (induc prom) | Bassilana M, et al., Eukaryot Cell, 2003; 2: 9.      |
| No | No | Yes | CEF3 (YEF3/EFT3) | CAA78282   | Translation elongation factor 3               | translational elongation                 | Translation elongation factor 3                                             | avirulent (induc prom) | Nakayama, et al., Infect Immun, 2000; 68: 6712.      |
| No | No | Yes | RHO1             | O42825     | GTP-binding protein RHO1                      | 1,3 beta-glucan biosynthetic process     | GTPase of Rho family>>regulates beta 1,3-glucan synthesis                   | avirulent (induc.prom) | Smith SE, et al., FEMS Yeast Res, 2002; 2: 103.      |
| No | No | No  | ADE2             | Q92210     | Phosphoribosylaminoimidazole carboxylase      | adenine biosynthesis                     | phosphoribosylaminoimidazole carboxylase                                    | reduced virulence      | Kirsch DR, Whitney RR. Infect Immun, 1991; 59: 3297. |
| No | No | No  | AGE3             | A0A1D8PCP6 | Age3p                                         | pathogenesis                             | Putative transcription factor with zinc finger DNA-binding motif            | reduced virulence      | Epp E, et al., PLoS Pathog, 2010; 6: e1000753        |
| No | No | No  | ALS1             | Q5A8T4     | Agglutinin-like protein 1 (Adhesin 1)         | cell adhesion, hyphal growth             | adhesin                                                                     | reduced virulence      | Fu Y, et al., Mol Microbiol, 2002; 44: 61.           |
| No | No | No  | ARF1             | P22274     | ADP-ribosylation factor                       | GTP-binding                              | intracellular protein transport                                             | reduced virulence      | Zhang B, et al., Fungal Genet Biol, 2015; 81: 261.   |
| No | No | No  | ATC1             | Q5AAU5     | Cell wall acid trehalase ATC1                 | trehalose catabolic process              | cell wall acid trehalase                                                    | reduced virulence      | Pedreno Y, et al., FEBS J, 2018; 285: 2004.          |
| No | No | No  | ATG8             | P0C075     | Autophagy-related protein 8                   |                                          |                                                                             | reduced virulence      | Li J, et al., Int J Med Microbiol, 2018; 308: 378.   |
| No | No | No  | BIG1             | Q59WG7     | Protein BIG1                                  | adhesion, filamentation                  | involved in beta-1,6 glucan synthesis                                       | reduced virulence      | Umeyama T, et al., Infect Immun, 2006; 74: 2373.     |
| No | No | No  | BMH1             | O42766     | 14-3-3 protein homolog                        | hyphal growth                            | multifunctional signal-modulating 14-3-3 protein                            | reduced virulence      | Kelly MN, et al., Microbiology, 2009; 155: 1536.     |

|    |    |    |            |            |                                                    |                                                    |                                                             |                   |                                                            |
|----|----|----|------------|------------|----------------------------------------------------|----------------------------------------------------|-------------------------------------------------------------|-------------------|------------------------------------------------------------|
| No | No | No | CAS5       | Q5AMH6     | Cell wall integrity transcriptional regulator CAS5 | cell wall damage response                          | Putative zinc finger transcription factor                   | reduced virulence | Chamilos G, et al., J Infect Dis, 2009; 200: 152.          |
| No | No | No | CAT1       | O13289     | Peroxisomal catalase                               | hydrogen pyroxide catabolic process, hyphal growth | catalase                                                    | reduced virulence | Wysong DR, et al., Infect Immun, 1998; 66: 1953.           |
| No | No | No | CCZ1       | A0A1D8PQ69 | Uncharacterized protein                            |                                                    | autophagy                                                   | reduced virulence | Dong Y, et al., Int J Biochem Cell Biol, 2015; 69: 41.     |
| No | No | No | CDC10      | P39827     | Cell division control protein 10                   | cell cycle                                         | pathogenesis                                                | reduced virulence | Gonzalez-Novo A, et al., Microbiol Immunol, 2006; 50: 499. |
| No | No | No | CDC11      | G1UB61     | Cell division control protein 11                   | cell cycle                                         | pathogenesis                                                | reduced virulence | Warenda AJ, et al., Infect Immun, 2003; 71: 4045.          |
| No | No | No | CEK1       | Q5A1D3     | Extracellular signal-regulated kinase 1            | fungal cell wall biogenesis, hyphal growth         | ERK-family protein kinase                                   | reduced virulence | Csank C, et al., Infect Immun, 1998; 66: 2713.             |
| No | No | No | CHS3       | A0A1D8PFK5 | Chitin synthase                                    | cell wall biosynthetic process                     | chitin synthase                                             | reduced virulence | Mio T, et al., J Bacteriol, 1996; 178: 2416.               |
| No | No | No | CHS7       | Q5AA40     | Chitin synthase export chaperone                   | cell wall biosynthetic process                     | Protein required for wild-type chitin synthase III activity | reduced virulence | Sanz M, et al., Microbiol, 2005; 151: 2623.                |
| No | No | No | CNB1       | A0A1D8PP58 | Calcineurin regulatory subunit B                   | hyphal growth, pH stress                           | Regulatory subunit of calcineurin                           | reduced virulence | Blankenship JR, et al., Eukaryot Cell, 2003; 2: 422.       |
| No | No | No | CNH1       | A0A1D8PKY1 | Cnh1p                                              | morphogenesis, metal ion transport                 | Na <sup>+</sup> /H <sup>+</sup> antiporter                  | reduced virulence | Soong TW, et al., Microbiology, 2000; 146: 1035.           |
| No | No | No | COS1(NIK1) | Q5A599     | Histidine protein kinase NIK1                      | cell wall biosynthetic process                     | Histidine kinase                                            | reduced virulence | Selitrennikoff CP, et al., Med Mycol, 2001; 39: 69.        |
| No | No | No | CPH1       | P43079     | Transcription factor CPH1                          | mating and hyphal growth                           | Transcription factor                                        | reduced virulence | Lo JH, et al., Cell, 1997; 90: 939.                        |
| No | No | No | CPP1       | Q5APU2     | Dual specificity protein tyrosine phosphatase CCP1 | pheromone response                                 | MAPK phosphatase of the VH1 family                          | reduced virulence | Csank C, et al., Mol Biol, 1997, Cell; 8: 2539.            |

|    |    |    |       |            |                                                                |                                              |                                                          |                   |                                                               |
|----|----|----|-------|------------|----------------------------------------------------------------|----------------------------------------------|----------------------------------------------------------|-------------------|---------------------------------------------------------------|
| No | No | No | CRH11 | Q5AFA2     | Extracellular glycosidase CRH11                                | cell wall org                                | glycosylphosphatidylinositol-dep cell wall pts           | reduced virulence | Pardini G, et al., J Biol Chem, 2006; 281: 40399.             |
| No | No | No | CRH12 | Q5AK54     | Extracellular glycosidase CRH12                                | cell wall org                                | glycosylphosphatidylinositol-dep cell wall pts           | reduced virulence | Pardini G, et al., J Biol Chem, 2006; 281: 40399.             |
| No | No | No | CSP37 | Q5A9D4     | Csp37p                                                         | pathogenesis, cell wall                      | Plasma membrane, hyphal cell wall protein                | reduced virulence | Sentandreu M, et al., J Bacteriol, 1997; 179: 4654.           |
| No | No | No | CST20 | P0CY24     | Serine/threonine-protein kinase CST20                          | protein serine/threonine kinase activity     | pathogenesis                                             | reduced virulence | Leberer E, et al., Proc Natl Acad Sci USA, 1996; 93: 13217.   |
| No | No | No | CTF1  | A0A1D8PGH7 | Ctf1p                                                          | fatty acid catabolic process                 | Putative zinc-finger transcription factor                | reduced virulence | Ramirez MA, Lorenz MC. Eukaryot Cell, 2009; 8: 1604.          |
| No | No | No | DPP3  | Q5AH74     | Bifunctional diacylglycerol diphosphate phosphatase            | farnesol biosynthesis                        | phosphatase, converts farnesyl PP to farnesol            | reduced virulence | Navarathna DH, et al., Infect Immun, 2007; 75: 1609.          |
| No | No | No | DRG1  | Q5A779     | GTP-binding protein                                            | filamentous growth                           | cytoplasmic G protein>>filamentous growth                | reduced virulence | Chen X, Kumamoto CA. Microbiology, 2006; 152: 3691.           |
| No | No | No | ECM25 | A0A1D8PFN0 | Ecm25p                                                         | morphogenesis, cell wall organization        | protein involved in cell morphogenesis                   | reduced virulence | Zhang T, et al., Sci China C Life Sci, 2008; 51: 362.         |
| No | No | No | EFG1  | Q59X67     | Enhanced filamentous growth protein 1                          | hyphal growth, metabolism                    | Transcriptional repressor                                | reduced virulence | Lo JH, et al., Cell, 1997; 90: 939.                           |
| No | No | No | ERG24 | AOW27923   | sterol C-14 reductase                                          | ergosterol biosynthetic process              | sterol C-14 reductase                                    | reduced virulence | Jia N, et al., Antimicrob Agents Chemother, 2002; 46: 947.    |
| No | No | No | ERG3  | Q59VG6     | C-5 sterol desaturase                                          | ergosterol synthesis, hyphal growth          | sterol C5,6-desaturase                                   | reduced virulence | Chau AS, et al., Antimicrob Agents Chemother, 2005; 49: 3646. |
| No | No | No | FOX2  | A0A1D8PJ13 | Bifunctional hydroxyacyl-CoA dehydrogenase/enoyl-CoA hydratase | fatty acid B oxidation                       | peroxisomal enzyme;Predicted 3-hydroxyacyl-CoA epimerase | reduced virulence | Piekarska K, et al., Eukaryot Cell, 2006; 5: 1847.            |
| No | No | No | GLN3  | A0A1D8PNX9 | Nitrogen-responsive transcriptional regulator                  | transcriptional regulator                    | pathogenesis                                             | reduced virulence | Liao WL, et al., Fungal Genet Biol, 2008; 45: 514.            |
| No | No | No | GNA1  | Q5AHF9     | Glucosamine 6-phosphate N-acetyltransferase                    | UDP-N-acetylglucosamine biosynthetic process | glucosamine-6-phosphate acetyltransferase                | reduced virulence | Mio T, et al., Microbiology, 2000; 146:1753.                  |



|    |    |    |            |            |                                                      |                                             |                                                                    |                   |                                                      |
|----|----|----|------------|------------|------------------------------------------------------|---------------------------------------------|--------------------------------------------------------------------|-------------------|------------------------------------------------------|
| No | No | No | GPI7       | Q8TGB2     | GPI ethanolamine phosphate transferase 2             | GPI anchor biosynthesis                     | Protein involved in attachment of GPI-linked proteins to cell wall | reduced virulence | Richard M, et al., Mol Microbiol, 2002; 44: 841.     |
| No | No | No | GRX2(TTR1) | Q5ABB1     | Dithiol glutaredoxin                                 | pathogenesis, oxidative stress              | putative glutathione reductase                                     | reduced virulence | Chaves GM, et al., Genet Mol Res, 2007; 6: 1051.     |
| No | No | No | HEM3       | O94048     | Porphobilinogen deaminase, PBG                       | heme biosynthetic process                   | Hydroxymethylbilane synthase (uroporphyrinogen I synthase)         | reduced virulence | Kirsch DR, Whitney RR. Infect Immun, 1991; 59: 3297. |
| No | No | No | HGC1       | Q5ABE2     | Hypha-specific G1 cyclin-related protein 1           | hyphal morphogenesis                        | G1 cyclin-related protein                                          | reduced virulence | Zeng X, et al., EMBO, 2004; 23: 1845.                |
| No | No | No | HGT4       | Q5ANE1     | Glucose sensor                                       | CHO transport                               | glucose and galactose sensor                                       | reduced virulence | Brown V, et al., Eukaryot Cell, 2006; 5: 1726.       |
| No | No | No | HPD1       | A0A1D8PQ07 | Hpd1p                                                | 3-hydroxyisobutyrate dehydrogenase activity | propionyl-CoA catabolic process                                    | reduced virulence | Otzen C, et al., J Biol Chem, 2014; 289: 8151.       |
| No | No | No | HSL1       | Q5AG71     | Serine/threonine-protein kinase HSL1                 | filamentous growth                          | Ser/Thr protein kinase                                             | reduced virulence | Umeyama T, et al., Mol Microbiol, 2005; 55: 381.     |
| No | No | No | HWP1       | P46593     | Hyphal wall protein 1(Cell elongation protein 2)     | adhesion,cell wall organization             | hyphal cell wall protein                                           | reduced virulence | Tsachimori N, et al., Infect Immun, 2000; 68: 1997.  |
| No | No | No | HWP2       | Q59PF9     | Hyphal wall protein 2(GPI-anchored protein 8)        | filamentous growth, pathogenesis            | GPI-anchored protein                                               | reduced virulence | Hayek P, et al., Microbiol Res, 2010; 165: 250.      |
| No | No | No | IFF11      | Q5A7R7     | Cell wall protein IFF11 (Adhesin-like protein IFF11) | cell wall structure, virulence              | Secreted protein                                                   | reduced virulence | Bates S, et al., Infect Immun, 2007; 75: 2922.       |
| No | No | No | IFF4       | Q5AAL9     | Cell wall protein IFF4(Adhesin-like protein IFF4)    | adhesion, pathogenesis                      | GPI anchor protein                                                 | reduced virulence | Kempf M, et al., Mycopathologia, 2009; 168: 73.      |
| No | No | No | INP51      | A0A1D8PIH6 | Phosphoinositide 5-phosphatase                       | cell integrity pathway, hyphal growth       | phosphatidylinositol-(4,5)-bisphosphate [PI(4,5)P2] 5-phosphatase  | reduced virulence | Badrane H, et al., Microbiology, 2008; 154: 3296.    |
| No | No | No | INT1       | P53705     | Bud site selection protein BUD4                      | morphogenesis, adhesion                     | Integrin-like protein                                              | reduced virulence | Gale, CA, et al., Science, 1998; 279: p1355.         |
| No | No | No | IRS4       | Q59SR6     | Increased rDNA silencing protein 4                   | adhesion, cell wall organization            | Protein with roles in cell wall integrity                          | reduced virulence | Badrane H, et al., Microbiology, 2005; 151: 2923.    |

|    |    |    |             |            |                                                                |                                                |                                                                 |                   |                                                                     |
|----|----|----|-------------|------------|----------------------------------------------------------------|------------------------------------------------|-----------------------------------------------------------------|-------------------|---------------------------------------------------------------------|
| No | No | No | KEX2        | A0A1D8PEG3 | Kexin                                                          | hyphal growth, pathogenesis                    | Subtilisin-like protease (proprotein convertase)                | reduced virulence | Newport G, et al., J.Biol.Chem. 2003; 278:1713.                     |
| No | No | No | LIG4        | P52496     | DNA ligase 4                                                   | DNA double strand break repair                 | DNA ligase                                                      | reduced virulence | Andaluz E, et al., Infect Immun, 2001; 69: 137.                     |
| No | No | No | MAD2        | Q59VQ3     | Spindle assembly checkpoint component MAD2                     | mitotic cell cycle spindle assembly            | spindle assembly checkpoint (SAC) component                     | reduced virulence | Bai C, et al., Mol Microbiol, 2002; 45: 31.                         |
| No | No | No | MCA1        | Q5ANA8     | Metacaspase-1                                                  | apoptosis                                      | apoptotic process                                               | reduced virulence | Jeong J, et al., Fungal Genet Biol, 2016; 97: 18.                   |
| No | No | No | MDR1        | Q5ABU7     | Multidrug resistance protein 1 (Benomyl resistance protein 1)  | biofilm formation, drug export                 | Multidrug efflux pump of plasma membrane                        | reduced virulence | Becker JM, et al., Infect Immun, 1995; 63: 4515.                    |
| No | No | No | MDS3        | Q59WF4     | Negative regulator of sporulation MDS3                         | pH induced hyphal formation                    | required for growth and hyphal formation at alkaline pH         | reduced virulence | Davis DA, et al., Genetics, 2002; 162: 1573.                        |
| No | No | No | MIT1        | A0A1D8PIF7 | Mannosylinositol phosphorylceramide synthase catalytic subunit | glycosphingolipid synthesis                    | GDP-mannose:inositol-phospho-ceramide mannose transferase       | reduced virulence | Mille C, et al., J Biol Chem, 2004; 279: 47952.                     |
| No | No | No | MKC1        | Q5AAG6     | Mitogen-activated protein kinase MKC1                          | filamentous, hyphal growth                     | mitogen-activated protein kinase                                | reduced virulence | Diez-Orejas R, et al., Infect Immun, 1997; 65: 833.                 |
| No | No | No | MLT1        | Q5A762     | Multiple drug resistance-associated protein-like transporter 1 | Vacuolar multi-drug resistance ABC transporter | pathogenesis                                                    | reduced virulence | Khandelwal NK, et al., Biochem J, 2016; 473: 1537.                  |
| No | No | No | MNN5 (MNN2) | Q59WF4     | Alpha-1,2-mannosyltransferase MNN2                             | filamentous, hyphal growth                     | alpha-1,2-mannosyltransferase                                   | reduced virulence | Bai C, et al., Eukaryot Cell, 2006; 5: 238.                         |
| No | No | No | MNT1        | Q00310     | Glycolipid 2-alpha-mannosyltransferase 1                       | adhesion, filamentous growth                   | Alpha-1,2-mannosyltransferase                                   | reduced virulence | Buurman ET, et al., Proc Natl Acad Sci U S A, 1998; 95: 7670.       |
| No | No | No | MRS4        | Q5A2T7     | Fe(2+) transporter                                             | iron ion transmembrane transporter activity    | iron ion homeostasis                                            | reduced virulence | Xu N, et al., Biochim Biophys Acta, 2014; 1843: 629.                |
| No | No | No | NAG2 (DAC1) | A0A1D8PQG3 | N-acetylglucosamine-6-phosphate deacetylase                    | N-acetylglucosamine catabolic process          | N-acetylglucosamine-6-phosphate (GlcNAcP) deacetylase           | reduced virulence | Yamada-Okabe T, et al., Eur J Biochem, 2001; 268: 2498.             |
| No | No | No | NAG3        | A0A1D8PQG0 | Major facilitator superfamily multidrug transporter NAG3       | drug transport                                 | Putative transporter of the major facilitator superfamily (MFS) | reduced virulence | Yamada-Okabe T, Yamada-Okabe H. FEMS Microbiol Lett, 2002; 212: 15. |

|    |    |    |       |            |                                                             |                                                                                        |                                                                                       |                   |                                                                     |
|----|----|----|-------|------------|-------------------------------------------------------------|----------------------------------------------------------------------------------------|---------------------------------------------------------------------------------------|-------------------|---------------------------------------------------------------------|
| No | No | No | NAG4  | Q59RG0     | Major facilitator superfamily multidrug transporter<br>NAG4 | drug transport                                                                         | Putative transporter                                                                  | reduced virulence | Yamada-Okabe T, Yamada-Okabe H. FEMS Microbiol Lett, 2002; 212: 15. |
| No | No | No | NAG6  | Q9C0L9     | Protein SEY1                                                | hexose transport                                                                       | Protein required for wild-type mouse virulence and wild-type cycloheximide resistance | reduced virulence | Yamada-Okabe T, Yamada-Okabe H. FEMS Microbiol Lett, 2002; 212: 15. |
| No | No | No | NOT5  | A0A1D8PE87 | CCR4-NOT core subunit                                       | adhesion, hyphal growth                                                                | member of CCR-NOT complex>>global regulator of transcription                          | reduced virulence | Cheng S, et al., Infect Immun, 2005; 73: 7190.                      |
| No | No | No | NRG1  | Q5A0E5     | Transcriptional regulator NRG1                              | hyphal growth                                                                          | Transcriptional repressor                                                             | reduced virulence | Murad AM, et al., EMBO J, 2001; 20: 4742.                           |
| No | No | No | PDE2  | A0A1D8PCV9 | Phosphodiesterase                                           | cAMP-mediated signal transduction pathway for morphologic switching (hyphal formation) | phosphodiesterase>>high affinity for cAMP                                             | reduced virulence | Bahn YS, et al., Mol Microbiol, 2003; 50: 391.                      |
| No | No | No | PEP12 | A0A1D8PNI0 | SNAP receptor                                               | vacuolar transport, endocytosis, and secretion                                         | t-SNARE (pre-vacuolar trafficking gene)                                               | reduced virulence | Palanisamy SK, et al., Eukaryot Cell, 2010; 9: 266.                 |
| No | No | No | PGA13 | Q5A343     | GPI-anchored protein 13                                     | cell wall synthesis                                                                    | pathogenesis                                                                          | reduced virulence | Gelis S, et al., Fungal Genet Biol, 2012; 49: 322.                  |
| No | No | No | PHO4  | A0A1D8PMD1 | Phosphate-sensing transcription factor                      | protein dimerization activity                                                          | cellular phosphate ion homeostasis                                                    | reduced virulence | Ikeh MA, et al., Mol Biol Cell, 2016; 27: 2784.                     |
| No | No | No | PLB1  | Q9UWF6     | Lysophospholipase 1                                         | migration in host, pathogenesis                                                        | phospholipase B                                                                       | reduced virulence | Leidich SD, et al., J Biol Chem, 1998; 273: 26078.                  |
| No | No | No | PLB5  | A0A1D8PEB1 | Lysophospholipase                                           | multigene phospholipase family                                                         | phospholipase B                                                                       | reduced virulence | Theiss S, et al., Int J Med Microbiol, 2006; 296: 405.              |
| No | No | No | PLD1  | A0A1D8PF62 | Phospholipase                                               | hyphal growth, pathogenesis                                                            | Phospholipase D1                                                                      | reduced virulence | Dolan JW, et al., Med Mycol, 2004; 42: 439.                         |
| No | No | No | PMT4  | Q59X23     | Dolichyl-phosphate-mannose--protein mannosyltransferase 4   | cell wall organization, hyphal growth                                                  | isoforms of protein mannosyltransferases                                              | reduced virulence | Rouabhia M, et al., Infect Immun, 2005; 73: 4571.                   |

|    |    |    |        |        |                                                           |                                                     |                                                       |                   |                                                   |
|----|----|----|--------|--------|-----------------------------------------------------------|-----------------------------------------------------|-------------------------------------------------------|-------------------|---------------------------------------------------|
| No | No | No | PMT5   | Q5ACU3 | Dolichyl-phosphate-mannose--protein mannosyltransferase 5 | cell wall organization, hyphal growth               | isoforms of protein mannosyltransferases              | reduced virulence | Rouabhia M, et al., Infect Immun, 2005; 73: 4571. |
| No | No | No | PMT6   | Q5A688 | Dolichyl-phosphate-mannose--protein mannosyltransferase 6 | cell wall organization, hyphal growth               | Protein mannosyltransferases                          | reduced virulence | Timpel C, et al., J Bacteriol, 2000 ; 182: 3063.  |
| No | No | No | RAS1   | Q59XU5 | Ras-like protein 1 (Ras homolog type B)                   | cAMP-mediated signaling                             | RAS signal transduction GTPase                        | reduced virulence | Leberer E, et al., Mol Microbiol, 2001; 42: 673.  |
| No | No | No | Rvs161 | Q5AFE4 | Regulator of cytoskeleton and endocytosis RVS161          | cytoskeletal protein binding                        | pathogenesis                                          | reduced virulence | Douglas LM, et al., Infect Immun, 2009; 77: 4150. |
| No | No | No | Rvs167 | Q59LF3 | Regulator of cytoskeleton and endocytosis RVS167          | cytoskeletal protein binding                        | pathogenesis                                          | reduced virulence | Douglas LM, et al., Infect Immun, 2009; 77: 4150. |
| No | No | No | RCH1   | Q59UQ7 | Solute carrier RCH1                                       | negatively regulates the cytosolic homeostasis      | calcium ion import                                    | reduced virulence | Jiang L, et al., Fungal Genet Biol, 2018; 115: 1. |
| No | No | No | RFX2   | Q5AMQ6 | RFX-like DNA-binding protein RFX2                         | filamentation, adhesion                             | Transcriptional repressor                             | reduced virulence | Hao B, et al., Eukaryot Cell, 2009; 8: 627.       |
| No | No | No | RIM101 | Q9UW14 | pH-response transcription factor pacC                     | filamentous, hyphal growth                          | Transcription factor involved in alkaline pH response | reduced virulence | Davis D, et al., Infect Immun, 2000; 68: 5953.    |
| No | No | No | RIM8   | Q9UW13 | pH-response regulator protein paIF                        | filamentous, hyphal growth                          | Transcription factor involved in alkaline pH response | reduced virulence | Davis D, et al., Infect Immun, 2000; 68: 5953.    |
| No | No | No | RVS161 | Q5AFE4 | Regulator of cytoskeleton and endocytosis RVS161          | endocytosis, cell wall organization                 | Amphiphysin membrane protein containing a BAR domain  | reduced virulence | Douglas LM, et al., Infect Immun, 2009; 77: 4150. |
| No | No | No | RVS167 | Q59LF3 | Regulator of cytoskeleton and endocytosis RVS167          | endocytosis, cell wall organization                 | Protein containing a BAR domain                       | reduced virulence | Douglas LM, et al., Infect Immun, 2009; 77: 4150. |
| No | No | No | SAP7   | Q59VH7 | Candidapepsin-7                                           | protein metabolic process, pathogenesis             | Member of the secreted aspartyl proteinase family     | reduced virulence | Taylor BN, et al., Infect Immun, 2005; 73: 7061.  |
| No | No | No | SDH2   | Q59QN7 | Succinate dehydrogenase [ubiquinone] iron-sulfur subunit  | transferring electrons from succinate to ubiquinone | respiratory electron transport chain                  | reduced virulence | Bi S, et al., Future Microbiol, 2018; 13: 1141.   |

|    |    |    |       |            |                                                                 |                                                  |                                                                                             |                   |                                                     |
|----|----|----|-------|------------|-----------------------------------------------------------------|--------------------------------------------------|---------------------------------------------------------------------------------------------|-------------------|-----------------------------------------------------|
| No | No | No | SEF1  | Q59UY7     | Transcriptional regulatory protein SEF1                         | Transcription factor                             | pathogenesis                                                                                | reduced virulence | Chen C, et al., Cell Host Microbe, 2011; 10: 118.   |
| No | No | No | SET1  | Q5ABG1     | Histone-lysine N-methyltransferase domain-containing protein 1) | cellular developmental process, filamentation    | putative lysine histone methyltransferase                                                   | reduced virulence | Raman SB, et al., Mol Microbiol, 2006; 60: 697.     |
| No | No | No | SFL1  | Q5A287     | Transcription factor SFL1                                       | filamentous growth, flocculation                 | transcriptional repressor                                                                   | reduced virulence | Li Y, et al., Eukaryot Cell, 2007; 6: 2112.         |
| No | No | No | SHO1  | Q5AQ36     | High osmolarity signaling protein SHO1                          | osmotic & oxidative stress                       | Predicted adaptor protein involved in activation of MAP kinase-dependent signaling pathways | reduced virulence | Roman E, et al., Eukaryot Cell, 2009; 8: 1235.      |
| No | No | No | SIT4  | Q59KY8     | Serine/threonine-protein phosphatase SIT4                       | hyphal growth, pathogenesis                      | catalytic subunit of a type2A-related protein phosphatase                                   | reduced virulence | Lee CM, et al., Mol Microbiol, 2004; 51: 691.       |
| No | No | No | SKN7  | Q5A4X5     | Transcription factor SKN7                                       | response to oxidative stress, filamentous growth | response regulator protein in a phosphorelay signal transduction pathway                    | reduced virulence | Singh P, et al., Infect Immun, 2004; 72: 2390.      |
| No | No | No | SLK19 | Q5ADT0     | Slk19p                                                          | cell wall organization                           | alkaline-induced membrane pt                                                                | reduced virulence | Galan A, et al., Microbiology, 2004; 150: 2641.     |
| No | No | No | SLR1  | A0A1D8PIP0 | Slr1p                                                           | RNA binding                                      | pathogenesis                                                                                | reduced virulence | Ariyachet C, et al., Infect Immun, 2013; 81: 1267.  |
| No | No | No | SOD1  | A0A1D8PLJ3 | Superoxide dismutase                                            | hyphal growth, response to oxidative stress      | Cytosolic copper- and zinc-containing superoxide dismutase                                  | reduced virulence | Hwang CS, et al., Microbiology, 2002; 148: 3705.    |
| No | No | No | SOD5  | Q5AD07     | Cell surface Cu-only superoxide dismutase 5                     | pathogenesis, response to oxidative stress       | Copper- and zinc-containing superoxide dismutase                                            | reduced virulence | Martchenko M, et al., Mol Biol Cell, 2004; 15: 456. |
| No | No | No | SUT1  | A0A1D8PNM7 | Sut1p                                                           | DNA-binding transcription factor activity        | pathogenesis                                                                                | reduced virulence | Xu W, et al., PLoS Biol, 2015; 13: e1002076.        |
| No | No | No | SWE1  | Q5AP97     | Mitosis inhibitor protein kinase SWE1                           | morphogenesis, pathogenesis                      | morphogenesis checkpoint kinase                                                             | reduced virulence | Gale CA, et al., Microbiol, 2009; 155: 3847.        |
| No | No | No | TEC1  | Q5ANJ4     | Transcription activator TEC1                                    | cell adhesion, filamentous growth                | TEA/ATTS transcription factor                                                               | reduced virulence | Schweizer A, et al., Mol Microbiol, 2000; 38: 435.  |
| No | No | No | TPK2  | A0A1D8PHU1 | cAMP-dependent protein kinase catalytic subunit                 | morphogenesis, hyphal growth                     | catalytic subunit of a protein kinase A (PKA) isoform                                       | reduced virulence | Sonneborn A, et al., Mol Microbiol, 2000; 35: 386.  |



|    |    |    |       |            |                                                 |                                                             |                                                       |                   |                                                      |
|----|----|----|-------|------------|-------------------------------------------------|-------------------------------------------------------------|-------------------------------------------------------|-------------------|------------------------------------------------------|
| No | No | No | TPS2  | Q5A114     | Trehalose-phosphatase                           | stress response, hyphal growth                              | trehalose-6-phosphate phosphatase                     | reduced virulence | Zaragoza O, et al., Microbiology, 2002; 148: 1281.   |
| No | No | No | UME6  | Q59MD2     | Transcriptional regulatory protein UME6         | hyphal growth, pathogenesis                                 | Transcription factor                                  | reduced virulence | Banerjee M, et al., Mol Biol Cell, 2008; 19: 1354.   |
| No | No | No | URA3  | P13649     | Orotidine 5'-phosphate decarboxylase            | adhesion, filamentous growth                                | orotidine 5'-monophosphate decarboxylase              | reduced virulence | Kirsch DR, Whitney RR. Infect Immun, 1991; 59: 3297. |
| No | No | No | UTR2  | Q5AJC0     | Extracellular glycosidase UTR2                  | cell wall organization, hyphal growth                       | GPI anchored cell wall putative glycosidase           | reduced virulence | Pardini G, et al., J Biol Chem, 2006; 281: 40399.    |
| No | No | No | VPH2  | A0A1D8PFF4 | Vph2p                                           | vacuolar proton-transporting V-type ATPase complex assembly |                                                       | reduced virulence | Jia C, et al., Fungal Genet Biol, 2018; 114: 1.      |
| No | No | No | VPS21 | Q59X89     | Rab family GTPase                               | protein transport to vacuole                                | Rab GTPase                                            | reduced virulence | Johnston DA, et al., Infect Immun, 2009; 77: 2343.   |
| No | No | No | VPS28 | Q59SD1     | Vacuolar protein sorting-associated protein 28  | cell wall organization, pH response                         | Protein involved in proteolytic activation of Rim101p | reduced virulence | Cornet M, et al., Infect Immun, 2005; 73: 7977.      |
| No | No | No | VPS32 | Q5ABD0     | Vacuolar-sorting protein SNF7                   | filamentous growth, cell wall organization                  | Protein involved in proteolytic activation of Rim101p | reduced virulence | Cornet M, et al., Infect Immun, 2005; 73: 7977.      |
| No | No | No | YHB1  | Q59MV9     | Flavoheomprotein                                | nitric oxide dioxygenase activity                           | pathogenesis                                          | reduced virulence | Hromatka BS, et al., Mol Biol Cell, 2005; 16: 4814.  |
| No | No | No | YPT72 | A0A1D8PHR9 | Rab family GTPase                               | GTPase activity                                             | pathogenesis                                          | reduced virulence | Johnston DA, et al., Infect Immun, 2009; 77: 2343.   |
| No | No | No | YSY6  | A0A1D8PJ9  | Stress-associated endoplasmic reticulum protein |                                                             | protein transport                                     | reduced virulence | Li J, et al., Int J Med Microbiol, 2018; 308: 378.   |
| No | No | No | YVC1  | Q5A2J7     | Calcium channel YVC1                            | hyphal growth, pathogenesis                                 | protein phosphatase                                   | reduced virulence | Yu Q, et al., Int J Med Microbiol, 2014; 304: 339.   |
| No | No | No | YVH1  | A0A1D8PSH7 | Tyrosine protein phosphatase                    | protein tyrosine/serine/threonine phosphatase activity      | pathogenesis                                          | reduced virulence | Hanaoka N, et al., Microbiology, 2005; 151: 2223.    |

|    |    |    |       |            |                                                           |                                           |                                             |                                             |                                                    |
|----|----|----|-------|------------|-----------------------------------------------------------|-------------------------------------------|---------------------------------------------|---------------------------------------------|----------------------------------------------------|
| No | No | No | PMT2  | Q5ADM9     | Dolichyl-phosphate-mannose--protein mannosyltransferase 2 | cell wall organization, hyphal growth     | isoforms of protein mannosyltransferases    | reduced virulence (heterozygote)            | Rouabhia M, et al., Infect Immun, 2005; 73: 4571.  |
| No | No | No | FBA1  | Q9URB4     | Fructose-bisphosphate aldolase                            | glycolysis                                | fructose-1,6-bisphosphate aldolase          | reduced virulence (induc prom)              | Rodaki A, et al., Eukaryot Cell, 2006; 5: 1371.    |
| No | No | No | NMT1  | P30418     | Glycylpeptide N-tetradecanoyltransferase                  | drug binding, pathogenesis                | MyristoylCoA:protein N-myristoyltransferase | reduced virulence (knock-down strain)       | Weinberg RA, et al., Mol Microbiol, 1995; 16: 241. |
| No | No | No | SAP4  | Q5A8N2     | Candidapepsin-4                                           | adhesion, pathogenesis                    | secreted aspartyl proteinases               | reduced virulence of triple deletion mutant | Sanglard D, et al., Infect Immun, 1997; 65: 3539.  |
| No | No | No | SAP5  | P43094     | Candidapepsin-5                                           | adhesion, pathogenesis                    | secreted aspartyl proteinases               | reduced virulence of triple deletion mutant | Sanglard D, et al., Infect Immun, 1997; 65: 3539.  |
| No | No | No | SAP6  | Q5AC08     | Candidapepsin-6                                           | adhesion, pathogenesis                    | secreted aspartyl proteinases               | reduced virulence of triple deletion mutant | Sanglard D, et al., Infect Immun, 1997; 65: 3539.  |
| No | No | No | ATP18 | A0A1D8PG50 | F1F0 ATP synthase subunit i/j                             | proton transmembrane transporter activity | ATP synthesis coupled proton transport      | reduced virulence                           | Zhao Y, et al., Med Mycol, 2021; 59: 639.          |

Supplementary Table 2. Summary of F<sub>1</sub>F<sub>o</sub>-ATP synthase subunits of *C. albicans*.

| <i>C. albicans</i><br>gene name | Protein accession | Protein name                                                    | Function              | Biological process                     | Status                         |
|---------------------------------|-------------------|-----------------------------------------------------------------|-----------------------|----------------------------------------|--------------------------------|
| <i>ATP1</i>                     | A0A1D8PDC4        | F <sub>1</sub> F <sub>o</sub> -ATP synthase subunit $\alpha$    | produces ATP from ADP | ATP synthesis coupled proton transport | Protein inferred from homology |
| <i>ATP2</i>                     | A0A1D8PKZ9        | F <sub>1</sub> F <sub>o</sub> -ATP synthase subunit $\beta$     | produces ATP from ADP | ATP synthesis coupled proton transport | Protein inferred from homology |
| <i>ATP3</i>                     | A0A1D8PRY3        | F <sub>1</sub> F <sub>o</sub> -ATP synthase subunit $\gamma$    | produces ATP from ADP | ATP synthesis coupled proton transport | Protein inferred from homology |
| <i>ATP4</i>                     | Q59ZE0            | F <sub>1</sub> F <sub>o</sub> -ATP synthase subunit 4           | produces ATP from ADP | ATP synthesis coupled proton transport | Protein predicted              |
| <i>ATP5</i>                     | Q5A7P7            | F <sub>1</sub> F <sub>o</sub> -ATP synthase subunit 5           | produces ATP from ADP | ATP synthesis coupled proton transport | Protein inferred from homology |
| <i>ATP6</i>                     | Q9B8D4 (I2BJX7)   | F <sub>1</sub> F <sub>o</sub> -ATP synthase subunit a           | produces ATP from ADP | ATP synthesis coupled proton transport | Protein inferred from homology |
| <i>ATP7</i>                     | Q59PV8            | F <sub>1</sub> F <sub>o</sub> -ATP synthase subunit d           | produces ATP from ADP | ATP synthesis coupled proton transport | Protein inferred from homology |
| <i>ATP8</i>                     | Q9B8D3            | F <sub>1</sub> F <sub>o</sub> -ATP synthase subunit 8 (A6L)     | produces ATP from ADP | ATP synthesis coupled proton transport | Protein inferred from homology |
| <i>ATP9</i>                     | Q9B8D5            | F <sub>1</sub> F <sub>o</sub> -ATP synthase subunit 9           | produces ATP from ADP | ATP synthesis coupled proton transport | Protein inferred from homology |
| <i>ATP14</i>                    | A0A1D8PHL7        | F <sub>1</sub> F <sub>o</sub> -ATP synthase subunit h           | produces ATP from ADP | ATP synthesis coupled proton transport | Protein predicted              |
| orf19.5597.1                    | A0A1D8PQ38        | predicted F <sub>1</sub> F <sub>o</sub> -ATP synthase subunit e | produces ATP from ADP | ATP synthesis coupled proton transport | Protein inferred from homology |
| <i>ATP16</i>                    | A0A1D8PUD2        | F <sub>1</sub> F <sub>o</sub> -ATP synthase subunit $\delta$    | produces ATP from ADP | ATP synthesis coupled proton transport | Protein inferred from homology |
| <i>ATP17</i>                    | A0A1D8PRM5        | F <sub>1</sub> F <sub>o</sub> -ATP synthase subunit f           | produces ATP from ADP | ATP synthesis coupled proton transport | Protein predicted              |
| <i>ATP18</i>                    | A0A1D8PG50        | F <sub>1</sub> F <sub>o</sub> -ATP synthase subunit i/j         | produces ATP from ADP | ATP synthesis coupled proton transport | Protein predicted              |
| <i>ATP19</i>                    | A0A1D8PFD4        | F <sub>1</sub> F <sub>o</sub> -ATP synthase subunit k           | produces ATP from ADP | ATP synthesis coupled proton transport | Protein predicted              |
| <i>ATP20</i>                    | Q59M30            | F <sub>1</sub> F <sub>o</sub> -ATP synthase subunit g           | produces ATP from ADP | ATP synthesis coupled proton transport | Protein inferred from homology |
| <i>TIM11</i>                    | A0A1D8PL02        | F <sub>1</sub> F <sub>o</sub> -ATP synthase subunit e           | Produces ATP from ADP | ATP synthesis coupled proton transport | Protein inferred from homology |

Supplementary Table 3. Strains used in this study.

| Strain              | Parent              | Genotype                                                                                                        | Reference  |
|---------------------|---------------------|-----------------------------------------------------------------------------------------------------------------|------------|
| SC5314              |                     | Wild-type strain                                                                                                | 1          |
| <i>ATP16/atp16Δ</i> | SC5314              | orf19.7678-1Δ::FRT/orf19.7678-2                                                                                 |            |
| <i>atp16Δ/Δ</i>     | <i>ATP16/atp16Δ</i> | orf19.7678-1Δ::FRT/orf19.7678-2Δ::FRT                                                                           | This study |
| <i>atp16Δ/ATP16</i> | <i>atp16Δ/Δ</i>     | orf19.7678-1Δ::FRT/orf19.7678-2::FRT                                                                            | This study |
| Atp16 O/E           | SC5314              | <i>ADH1/adh1::PADH1</i> -orf19.7678-1- <i>caSAT1</i>                                                            | This study |
| SN250               |                     | wild-type (leu2Δ::C.d.HIS1/leu2Δ::C.m.LEU2,<br>ura3Δ/URA3, his1Δ/his1Δ, arg4Δ/arg4Δ,<br>iro1Δ/IRO1, MTLα/ MTLα) | 2          |
| <i>ras1Δ/Δ</i>      |                     | ura3::limm434/ura3::limm434<br>ras1::hisG/ras1::hisG:URA3                                                       | 3          |

Supplementary Table 4. Primers used in this study.

| Primers                                              | Sequence (5' to 3') <sup>a</sup>     |
|------------------------------------------------------|--------------------------------------|
| <i>atp16Δ/Δ</i> and <i>atp16Δ/ATP16</i> construction |                                      |
| ATP16-1                                              | CCCgggcccATCAACGACATGCAGAAC          |
| ATP16-2                                              | CCCctcgagGCCTCGGTGGCATAAGTT          |
| ATP16-3                                              | ATAAGAATgcgggccgcAGAGCTGAATCTAGTGATG |
| ATP16-4                                              | TCCccgcegTAAGCACTAAAGAAGGGT          |
| CassetF                                              | GCTTTCGGTCGCTGTTCTCA                 |
| CassetR                                              | TGTTAGGCGTCATCCTGTGC                 |
| ATP16-5                                              | AAGTCATAGAAGMAGCGGCAAG               |
| ATP16-6                                              | TCCAGACAGTCGAGTTAG                   |
| ATP16-7                                              | TCTCGGGAGCACAGGATG                   |
| ATP16-8                                              | GTTGACTGGTGGCGTAGC                   |
| ATP16-F                                              | GAAATTATCCTTGGCATTG                  |
| ATP16-R                                              | TGGTCAGAGTCTCCGTTT                   |
| Atp16 O/E construction                               |                                      |
| ATP16orf-F                                           | CCCctcgagATGTTTCAGACAAGTTTTCCGTC AAG |
| ATP16orf-R                                           | CCCagatctTACTTAGTAAAATGTTGTAAAGC     |
| pADH1E2-ATP16-up-F                                   | TCTTGTTTCGAAACGGCAGTGCCTC            |
| pADH1E2-ATP16-up-R                                   | AACCAGATTTCCAGATTTCCAG               |
| pADH1E2-ATP16-down-F                                 | TAAGCAGACAGCTCCTTGGCATA C            |
| pADH1E2-ATP16-down-R                                 | GAGTTGTTGGAGAGGTAAACCCAG             |
| RT-qPCR                                              |                                      |
| ATP16-RTF                                            | AACTTATGCCACCGAGGC                   |
| ATP16-RTR                                            | CATCACTAGATTCAGCTCT                  |
| SSA1-F                                               | ATTGCTGAAGGTTATTTGGGTT C             |
| SSA1-R                                               | GGTGGCTTGTCTTTGAGAATC                |
| HWP1-F                                               | TGTCTACACTACATTCTGTC                 |
| HWP1-R                                               | AGGAATAGATGGTTGTGAAC                 |
| ALS3-F                                               | CTCATTACACCAACCATA CA                |
| ALS3-R                                               | GGATTCTGTGGTTGTAGTAT                 |
| HGC1-F                                               | GTATCGCTGGTTCTCGTGCT                 |
| HGC1-R                                               | AGGTGTACCACTACCACCATT                |
| RAS1-F                                               | ATCAAGATGGATTAGCATTGG                |
| RAS1-R                                               | TGTTGTTGCTGTTGTTGTTG                 |
| CYR1-F                                               | AGAAAGAAGACGATGAAACAG                |
| CYR1-R                                               | AGGAGAACTAGAGGATGTAGAC               |
| TPK1-F                                               | AGAACTTGCCAACAAACAAC                 |
| TPK1-R                                               | TTTCTTGGTCAAGGAAAGAC                 |
| TPK2-F                                               | TTGTTGCCTGAACGTTCTAC                 |
| TPK2-R                                               | CTACCATTGTGAACTGATCTC                |

|        |                           |
|--------|---------------------------|
| EFG1-F | ACAACCTCAGCATTACAATG      |
| EFG1-R | ATAGGTAAGTCTGTTGACC       |
| FLO8-F | AGCAAATGACTAAGATGGCTG     |
| FLO8-R | AGTCGGAATTACCAGTGTTTC     |
| CPH1-F | ATGCAACACTATTTATACCTC     |
| CPH1-R | CGGATATTGTTGATGATGATA     |
| TEC1-F | AGGTTCCCTGGTTTAAGTG       |
| TEC1-R | ACTGGTATGTGTGGGTGAT       |
| COX1-F | GCACTTCTTAGGATTGAATG      |
| COX1-R | TTCTTCACGCTCATTCTCAC      |
| COX2-F | AGATGCTACTCCAGGTCG        |
| COX2-R | ACTGCTCTACCATTGAGC        |
| COX3-F | CCCTACTATATCACCAGCTG      |
| COX3-R | TCACTAAGTGAAAATCCAGC      |
| COB-F  | GATAGATTGCCAATGCATCC      |
| COB-R  | CGAAGTATAGCATAGAATGG      |
| ATP6-F | GCTGGAGGTCATTTCTCCCT      |
| ATP6-R | TAGCACCAAGACGTAGACCT      |
| ATP8-F | CAGGTATTGCAGCTGTATCAA     |
| ATP8-R | AGCTCTAGCTACTAATAAACGTA   |
| ATP9-F | ACAGGTATTGCAGCTGTATCAAT   |
| ATP9-R | AGCTCTAGCTACTAATAAACGTAAT |

---

<sup>a</sup> Lowercase sequences represent the following restriction sites: ApaI for ATP16-1, XhoI for ATP16-2, NotI for ATP16-3, SacII for ATP16-4.

Supplementary Table 5. The mean fluorescence intensity value of ROS.

| Strains             | P1 Mean Fluorescence Intensity (PE) |                            |                            |
|---------------------|-------------------------------------|----------------------------|----------------------------|
|                     | 1 <sup>st</sup> experiment          | 2 <sup>nd</sup> experiment | 3 <sup>rd</sup> experiment |
| WT                  | 2181                                | 1205                       | 1361                       |
| <i>atp16Δ/Δ</i>     | 1795                                | 1197                       | 1243                       |
| <i>atp16Δ/ATP16</i> | 2635                                | 1116                       | 1352                       |

Supplementary Table 6. The red/green mean fluorescent intensity value of  $\Delta\Psi_m$ .

| Strains             | P1 Mean Fluorescence Intensity (PE) |            |                            |            |                            |            |
|---------------------|-------------------------------------|------------|----------------------------|------------|----------------------------|------------|
|                     | 1 <sup>st</sup> experiment          |            | 2 <sup>nd</sup> experiment |            | 3 <sup>rd</sup> experiment |            |
|                     | JC-1 Red                            | JC-1 green | JC-1 Red                   | JC-1 green | JC-1 Red                   | JC-1 green |
| WT                  | 6544                                | 8971       | 23322                      | 31970      | 11599                      | 17164      |
| <i>atp16Δ/Δ</i>     | 2954                                | 7766       | 6310                       | 16929      | 15127                      | 46298      |
| <i>atp16Δ/ATP16</i> | 4351                                | 6800       | 13057                      | 15592      | 17026                      | 22645      |

## Supplementary References

1. Gillum, A. M., Tsay, E. Y. & Kirsch, D. R. Isolation of the *Candida albicans* gene for orotidine-5'-phosphate decarboxylase by complementation of *S. cerevisiae ura3* and *E. coli pyrF* mutations. *Mol. Gen. Genet.* **198**, 179-182 (1984).
2. Noble, S. M., French, S., Kohn, L. A., Chen, V. & Johnson, A. D. Systematic screens of a *Candida albicans* homozygous deletion library decouple morphogenetic switching and pathogenicity. *Nat. Genet.* **42**, 590-598 (2010).
3. Grahl, N., *et al.* Mitochondrial Activity and Cyr1 Are Key Regulators of Ras1 Activation of *C. albicans* Virulence Pathways. *PLoS pathog.* **11**, e1005133 (2015).
